# Supplementary material
Source: publisher figshare collection journal article supplement (https://acs.figshare.com/ndownloader/files/12965420)
Supplement: Supplementary file 1 [file 12965420]

## Sheet: zpbe_PBEPW91_
											formation of Cu+-azide complexes
		E	H	G	Cv	Cp	S		sol. Energy		Delta G
CuNH3_2		52.352	52.944	30.968	17.929	19.916	73.708		-193594
CH3-N3.out:		33.782	34.375	14.208	13.215	15.202	67.639		-127989
H-N3.out:		15.129	15.721	-1.358	8.635	10.622	57.282		-103351
MePh-N3.out:		86.049	86.642	58.799	33.223	35.21	93.386		-272865
Ph-N3.out:		67.908	68.501	43.272	27.135	29.122	84.615		-248219
NO2PhN3		70.928	71.52	42.02	35.805	37.792	98.942		-376509
CuNH3_2_NO2PhN3	proximal	122.762	123.355	84.042	54.319	56.306	131.854		-570103		11.524
CuNH3_2_NO2PhN3	distal	124.846	125.439	82.958	59.703	61.691	142.48		-570109		4.37
CuNH3_2_HN3	proximal	67.975	68.567	40.018	28.686	30.673	95.754		-296948		7.878
CuNH3_2_HN3	distal	70.349	70.942	43.094	27.361	29.349	93.403		-296951		7.524
CuNH3_2_MeN3	proximal	86.488	87.081	55.527	33.619	35.606	105.831		-321584		9.171
CuNH3_2_MeN3	distal	87.221	87.813	55.707	35.038	37.025	107.684		-321591		3.171
CuNH3_2_MePhN3	distal	139.353	139.945	101.083	55.11	57.097	130.343		-466465		5.466
CuNH3_2_MePhN3	proximal	139.8	140.393	99.078	57.38	59.367	138.569		-466461		7.361
CuNH3_2_PhN3	distal	121.355	121.948	85.835	48.938	50.926	121.122		-441819		6.035
CuNH3_2_PhN3	proximal	119.822	120.414	85.548	45.649	47.636	116.941		-441814		10.948
CF3-C-C-I_only.out:		18.877	19.469	-7.065	22.542	24.53	88.994		-266692
CH2CH3-C-C-I_only.out:		50.514	51.106	26.139	20.752	22.74	83.74		-104573			formation of Cu-iodoalkyne pi complex
CH3-C-C-I_only.out:		31.959	32.552	9.964	15.985	17.972	75.759		-79929.8
Ph-C-C-I_only.out:		66.425	67.017	38.737	29.586	31.573	94.852		-200157		E	H	G	Cv	Cp	S		sol. Energy	Delta G
CF3-C-C-I.out:		72.055	72.647	36.069	44.111	46.099	122.683		-460305		0.826	0.234	12.166	3.64	1.653	-40.019		-18.37	-6.204
CH2CH3-C-C-I.out:		102.855	103.448	68.954	40.834	42.821	115.693		-298183		-0.011	-0.602	11.847	2.153	0.165	-41.755		-15.88	-4.033
CH3-C-C-I.out:		85.709	86.302	51.85	39.734	41.721	115.552		-273539		1.398	0.806	10.918	5.82	3.833	-33.915		-15	-4.082
Ph-C-C-I.out:		120.182	120.774	81.864	53.375	55.362	130.505		-393766		1.405	0.813	12.159	5.86	3.873	-38.055		-13.94	-1.781
Uncatalyzed reaction
uncatalyzed, separated reactants											pre-reactional complexes	G	S	sol. Energy			change in vibrational/etc. contributions to DeltaG vs. Pre-reactional complex	electronic energy change vs. Pre-reactional complex	increase in barrier (uncatalyzed) vs. Pre-reactional complex
separated azide and iodoalkyne	A	47.088	48.273	8.606	24.62	28.594	133.041		-183281	A		15.369	114.562	-183279			6.763	1.78	8.543
separated azide and iodoalkyne	B	65.741	66.927	24.172	29.2	33.174	143.398		-207919	B		33.889	113.228	-207920			9.717	-0.96	8.757
separated azide and iodoalkyne	C	99.867	101.053	53.236	43.12	47.094	160.374		-328149	C		61.656	134.163	-328147			8.42	2.29	10.71
separated azide and iodoalkyne	D	118.008	119.194	68.763	49.208	53.182	169.145		-352795	D		76.31	147.604	-352793			7.547	1.43	8.977
separated azide and iodoalkyne	E	34.006	35.19	-8.423	31.177	35.152	146.276		-370043	E		2.102	111.067	-370041			10.525	1.56	12.085
separated azide and iodoalkyne	F	65.643	66.827	24.781	29.387	33.362	141.022		-207923	F		36.34	102.727	-207928			11.559	-4.73	6.829
separated azide and iodoalkyne	G	81.554	82.738	37.379	38.221	42.195	152.134		-303508	G		47.899	119.369	-303511			10.52	-2.49	8.03
separated azide and iodoalkyne	H	52.659	53.844	7.143	35.757	39.732	156.633		-394681	H		16.982	125.804	-394679			9.839	1.97	11.809
separated azide and iodoalkyne	I	84.296	85.481	40.347	33.967	37.942	151.379		-232561	I		49.66	124.512	-232561			9.313	0.38	9.693
separated azide and iodoalkyne	J	100.207	101.392	52.945	42.801	46.775	162.491		-328146	J		62.344	135.433	-328145			9.399	1.11	10.509
separated azide and iodoalkyne	K	86.785	87.97	36.207	49.677	53.652	173.609		-514911	K		47.214	138.817	-514909			11.007	1.81	12.817
separated azide and iodoalkyne	L	118.422	119.607	69.411	47.887	51.862	168.355		-352792	L		79.29	137.091	-352789			9.879	2.6	12.479
separated azide and iodoalkyne	M	134.333	135.518	82.009	56.721	60.695	179.467		-448377	M		91.145	153.075	-448373			9.136	3.58	12.716
separated azide and iodoalkyne	N	104.926	106.111	51.734	55.765	59.74	182.38		-539557	N		60.793	156.043	-539555			9.059	1.72	10.779
separated azide and iodoalkyne	O	136.563	137.748	84.938	53.975	57.95	177.126		-377437	O		96.156	139.349	-377435			11.218	2.68	13.898
separated azide and iodoalkyne	P	152.474	153.659	97.536	62.809	66.783	188.238		-473022	P		109.376	148.32	-473018			11.84	4.75	16.59
Catalyzed reaction. Energies relative to infinitely-separated azide and Cu-iodoalkyne
											pre-reactional complexes	G	S	sol. Energy			change in vibrational/etc. contributions to DeltaG vs. Pre-reactional complex	electronic energy change vs. Pre-reactional complex	increase in barrier (catalyzed) vs. Pre-reactional complex
separated azide and Cu-iodoalkyne pi-complex	A	100.838	102.023	50.492	48.369	52.343	172.834		-376890	A		60.894	139.753	-376896			10.402	-6.05	4.352
separated azide and Cu-iodoalkyne pi-complex	B	119.491	120.677	66.058	52.949	56.923	183.191		-401528	B		78.17	142.342	-401534			12.112	-6.42	5.692
separated azide and Cu-iodoalkyne pi-complex	C	153.617	154.803	95.122	66.869	70.843	200.167		-521759	C		108.368	153.726	-521761			13.246	-2.08	11.166
separated azide and Cu-iodoalkyne pi-complex	D	171.758	172.944	110.649	72.957	76.931	208.938		-546404	D		123.614	164.597	-546407			12.965	-3.27	9.695
separated azide and Cu-iodoalkyne pi-complex	E	87.184	88.368	34.711	52.746	56.721	179.965		-563655	E		45.692	147.739	-563661			10.981	-5.16	5.821
separated azide and Cu-iodoalkyne pi-complex	F	117.984	119.169	67.596	49.469	53.443	172.975		-401534	F		80.231	135.465	-401543			12.635	-9.27	3.365
separated azide and Cu-iodoalkyne pi-complex	G	135.311	136.495	80.506	62.01	65.984	187.787		-497117	G		93.754	144.227	-497125			13.248	-8.9	4.348
separated azide and Cu-iodoalkyne pi-complex	H	105.837	107.022	50.277	57.326	61.301	190.322		-588293	H		62.107	156.033	-588301			11.83	-7.17	4.66
separated azide and Cu-iodoalkyne pi-complex	I	136.637	137.823	83.162	54.049	58.023	183.332		-426172	I		94.91	148.508	-426177			11.748	-5.4	6.348
separated azide and Cu-iodoalkyne pi-complex	J	153.964	155.149	96.072	66.59	70.564	198.144		-521755	J		109.409	153.759	-521761			13.337	-6.55	6.787
separated azide and Cu-iodoalkyne pi-complex	K	139.963	141.148	79.341	71.246	75.221	207.298		-708524	K		93.172	163.481	-708531			13.831	-6.88	6.951
separated azide and Cu-iodoalkyne pi-complex	L	170.763	171.949	112.226	67.969	71.943	200.308		-546402	L		124.229	166.729	-546405			12.003	-2.57	9.433
separated azide and Cu-iodoalkyne pi-complex	M	188.09	189.275	125.136	80.51	84.484	215.12		-641985	M		139.154	167.964	-641989			14.018	-3.95	10.068
separated azide and Cu-iodoalkyne pi-complex	N	158.104	159.289	94.868	77.334	81.309	216.069		-733169	N		106.932	179.326	-733174			12.064	-4.09	7.974
separated azide and Cu-iodoalkyne pi-complex	O	188.904	190.09	127.753	74.057	78.031	209.079		-571048	O		141.32	165.322	-571051			13.567	-3.67	9.897
separated azide and Cu-iodoalkyne pi-complex	P	206.231	207.416	140.663	86.598	90.572	223.891		-666631	P		155.171	172.623	-666636			14.508	-5.35	9.158
Catalyzed reaction. Energies relative to infinitely-separated azide , iodoalkyne and Cu+
											pre-reactional complexes	G	S	sol. Energy			change in vibrational/etc. contributions to DeltaG vs. Pre-reactional complex	electronic energy change vs. Pre-reactional complex	increase in barrier (catalyzed) vs. Pre-reactional complex
separated azide, Cu(NH3)2 and iodoalkyne	A	99.44	101.217	39.574	42.549	48.51	206.749		-376875			60.894	139.753	-376896			21.32	-21.05	0.27
separated azide, Cu(NH3)2 and iodoalkyne	B	118.093	119.871	55.14	47.129	53.09	217.106		-401513			78.17	142.342	-401534			23.03	-21.42	1.61
separated azide, Cu(NH3)2 and iodoalkyne	C	152.219	153.997	84.204	61.049	67.01	234.082		-521744			108.368	153.726	-521761			24.164	-17.08	7.084
separated azide, Cu(NH3)2 and iodoalkyne	D	170.36	172.138	99.731	67.137	73.098	242.853		-546389			123.614	164.597	-546407			23.883	-18.27	5.613
separated azide, Cu(NH3)2 and iodoalkyne	E	86.358	88.134	22.545	49.106	55.068	219.984		-563637			45.692	147.739	-563661			23.147	-23.53	-0.383
separated azide, Cu(NH3)2 and iodoalkyne	F	117.995	119.771	55.749	47.316	53.278	214.73		-401518			80.231	135.465	-401543			24.482	-25.15	-0.668
separated azide, Cu(NH3)2 and iodoalkyne	G	133.906	135.682	68.347	56.15	62.111	225.842		-497103			93.754	144.227	-497125			25.407	-22.84	2.567
separated azide, Cu(NH3)2 and iodoalkyne	H	105.011	106.788	38.111	53.686	59.648	230.341		-588275			62.107	156.033	-588301			23.996	-25.54	-1.544
separated azide, Cu(NH3)2 and iodoalkyne	I	136.648	138.425	71.315	51.896	57.858	225.087		-426156			94.91	148.508	-426177			23.595	-21.28	2.315
separated azide, Cu(NH3)2 and iodoalkyne	J	152.559	154.336	83.913	60.73	66.691	236.199		-521741			109.409	153.759	-521761			25.496	-20.49	5.006
separated azide, Cu(NH3)2 and iodoalkyne	K	139.137	140.914	67.175	67.606	73.568	247.317		-708506			93.172	163.481	-708531			25.997	-25.25	0.747
separated azide, Cu(NH3)2 and iodoalkyne	L	170.774	172.551	100.379	65.816	71.778	242.063		-546386			124.229	166.729	-546405			23.85	-18.45	5.4
separated azide, Cu(NH3)2 and iodoalkyne	M	186.685	188.462	112.977	74.65	80.611	253.175		-641971			139.154	167.964	-641989			26.177	-17.89	8.287
separated azide, Cu(NH3)2 and iodoalkyne	N	157.278	159.055	82.702	73.694	79.656	256.088		-733151			106.932	179.326	-733174			24.23	-22.46	1.77
separated azide, Cu(NH3)2 and iodoalkyne	O	188.915	190.692	115.906	71.904	77.866	250.834		-571032			141.32	165.322	-571051			25.414	-19.55	5.864
separated azide, Cu(NH3)2 and iodoalkyne	P	204.826	206.603	128.504	80.738	86.699	261.946		-666617			155.171	172.623	-666636			26.667	-19.29	7.377
											pre-reactional complexes	G	S	sol. Energy
uncatalyzed pre-reactional complex + Cu(NH3)2	A			46.337	132.491				-376873			60.894	139.753	-376896
uncatalyzed pre-reactional complex + Cu(NH3)2	B			64.857	131.157				-401514			78.17	142.342	-401534
uncatalyzed pre-reactional complex + Cu(NH3)2	C			92.624	152.092				-521741			108.368	153.726	-521761
uncatalyzed pre-reactional complex + Cu(NH3)2	D			107.278	165.533				-546388			123.614	164.597	-546407
uncatalyzed pre-reactional complex + Cu(NH3)2	E			33.07	128.996				-563635			45.692	147.739	-563661
uncatalyzed pre-reactional complex + Cu(NH3)2	F			67.308	120.656				-401522			80.231	135.465	-401543
uncatalyzed pre-reactional complex + Cu(NH3)2	G			78.867	137.298				-497105			93.754	144.227	-497125
uncatalyzed pre-reactional complex + Cu(NH3)2	H			47.95	143.733				-588273			62.107	156.033	-588301
uncatalyzed pre-reactional complex + Cu(NH3)2	I			80.628	142.441				-426155			94.91	148.508	-426177
uncatalyzed pre-reactional complex + Cu(NH3)2	J			93.312	153.362				-521740			109.409	153.759	-521761
uncatalyzed pre-reactional complex + Cu(NH3)2	K			78.182	156.746				-708504			93.172	163.481	-708531
uncatalyzed pre-reactional complex + Cu(NH3)2	L			110.258	155.02				-546384			124.229	166.729	-546405
uncatalyzed pre-reactional complex + Cu(NH3)2	M			122.113	171.004				-641968			139.154	167.964	-641989
uncatalyzed pre-reactional complex + Cu(NH3)2	N			91.761	173.972				-733149			106.932	179.326	-733174
uncatalyzed pre-reactional complex + Cu(NH3)2	O			127.124	157.278				-571029			141.32	165.322	-571051
uncatalyzed pre-reactional complex + Cu(NH3)2	P			140.344	166.249				-666612			155.171	172.623	-666636

## Sheet: Folha1
		G correction	S (cal)	solution energy			Cv, H and S contributions to the barrier increase	entropy contribuion to the barrier increase	electronic contribution to the barrier increase	barrier increase
A	separated azide and iodoalkyne	8.606	133.041	-183281	0
A	pre-reactional complexes without catalyst	15.369	114.562	-183279	1		6.763	5.50674	1.78	8.543
B	separated azide and iodoalkyne	24.172	143.398	-207919	0
B	pre-reactional complexes without catalyst	33.889	113.228	-207920	1		9.717	8.99066	-0.96	8.757
C	separated azide and iodoalkyne	53.236	160.374	-328149	0
C	pre-reactional complexes without catalyst	61.656	134.163	-328147	1		8.42	7.81088	2.29	10.71
D	separated azide and iodoalkyne	68.763	169.145	-352795	0
D	pre-reactional complexes without catalyst	76.31	147.604	-352793	1		7.547	6.41922	1.43	8.977
E	separated azide and iodoalkyne	-8.423	146.276	-370043	0
E	pre-reactional complexes without catalyst	2.102	111.607	-370041	1		10.525	10.3314	1.56	12.085
F	separated azide and iodoalkyne	24.781	141.022	-207923	0
F	pre-reactional complexes without catalyst	36.34	102.727	-207928	1		11.559	11.4119	-4.73	6.829
G	separated azide and iodoalkyne	37.379	152.134	-303508	0
G	pre-reactional complexes without catalyst	47.899	119.369	-303511	1		10.52	9.76397	-2.49	8.03
H	separated azide and iodoalkyne	7.143	156.633	-394681	0
H	pre-reactional complexes without catalyst	16.982	125.804	-394679	1		9.839	9.18704	1.97	11.809
I	separated azide and iodoalkyne	40.347	151.379	-232561	0
I	pre-reactional complexes without catalyst	49.66	124.512	-232561	1		9.313	8.00637	0.38	9.693
J	separated azide and iodoalkyne	52.945	162.491	-328146	0
J	pre-reactional complexes without catalyst	62.344	135.433	-328145	1		9.399	8.06328	1.11	10.509
K	separated azide and iodoalkyne	36.207	173.609	-514911	0
K	pre-reactional complexes without catalyst	47.214	138.817	-514909	1		11.007	10.368	1.81	12.817
L	separated azide and iodoalkyne	69.411	168.355	-352792	0
L	pre-reactional complexes without catalyst	79.29	137.091	-352789	1		9.879	9.31667	2.6	12.479
M	separated azide and iodoalkyne	82.009	179.467	-448377	0
M	pre-reactional complexes without catalyst	91.145	153.075	-448373	1		9.136	7.86482	3.58	12.716
N	separated azide and iodoalkyne	51.734	182.38	-539557	0
N	pre-reactional complexes without catalyst	60.793	156.043	-539555	1		9.059	7.84843	1.72	10.779
O	separated azide and iodoalkyne	84.938	177.126	-377437	0
O	pre-reactional complexes without catalyst	96.156	139.349	-377435	1		11.218	11.2575	2.68	13.898
P	separated azide and iodoalkyne	97.536	188.238	-473022	0
P	pre-reactional complexes without catalyst	109.376	148.32	-473018	1		11.84	11.8956	4.75	16.59
A	separated azide, Cu(NH3)2 and iodoalkyne	39.574	206.749	-376875	0					0
A	separated azide and Cu-iodoalkyne pi-complex	50.492	172.834	-376890	1		10.918	10.1067	-15	-4.082
A	pre-reactional complexes	60.894	139.753	-376896	2		21.32	19.9648	-21.05	0.27		4.352
B	separated azide, Cu(NH3)2 and iodoalkyne	55.14	217.106	-401513	0					0
B	separated azide and Cu-iodoalkyne pi-complex	66.058	183.191	-401528	1		10.918	10.1067	-15	-4.082
B	pre-reactional complexes	78.17	142.342	-401534	2		23.03	22.2797	-21.42	1.61		5.692
C	separated azide, Cu(NH3)2 and iodoalkyne	84.204	234.082	-521744	0					0
C	separated azide and Cu-iodoalkyne pi-complex	95.122	200.167	-521759	1		10.918	10.1067	-15	-4.082
C	pre-reactional complexes	108.368	153.726	-521761	2		24.164	23.9461	-17.08	7.084		11.166
D	separated azide, Cu(NH3)2 and iodoalkyne	99.731	242.853	-546389	0					0
D	separated azide and Cu-iodoalkyne pi-complex	110.649	208.938	-546404	1		10.918	10.1067	-15	-4.082
D	pre-reactional complexes	123.614	164.597	-546407	2		23.883	23.3203	-18.27	5.613		9.695
E	separated azide, Cu(NH3)2 and iodoalkyne	22.545	219.984	-563637	0					0
E	separated azide and Cu-iodoalkyne pi-complex	34.711	179.965	-563655	1		12.166	11.9257	-18.37	-6.204
E	pre-reactional complexes	45.692	147.739	-563661	2		23.147	21.529	-23.53	-0.383		5.821
F	separated azide, Cu(NH3)2 and iodoalkyne	55.749	214.73	-401518	0					0
F	separated azide and Cu-iodoalkyne pi-complex	67.596	172.975	-401534	1		11.847	12.443	-15.88	-4.033
F	pre-reactional complexes	80.231	135.465	-401543	2		24.482	23.621	-25.15	-0.668		3.365
G	separated azide, Cu(NH3)2 and iodoalkyne	68.347	225.842	-497103	0					0
G	separated azide and Cu-iodoalkyne pi-complex	80.506	187.787	-497117	1		12.159	11.3404	-13.94	-1.781
G	pre-reactional complexes	93.754	144.227	-497125	2		25.407	24.3213	-22.84	2.567		4.348
H	separated azide, Cu(NH3)2 and iodoalkyne	38.111	230.341	-588275	0					0
H	separated azide and Cu-iodoalkyne pi-complex	50.277	190.322	-588293	1		12.166	11.9257	-18.37	-6.204
H	pre-reactional complexes	62.107	156.033	-588301	2		23.996	22.1438	-25.54	-1.544		4.66
I	separated azide, Cu(NH3)2 and iodoalkyne	71.315	225.087	-426156	0					0
I	separated azide and Cu-iodoalkyne pi-complex	83.162	183.332	-426172	1		11.847	12.443	-15.88	-4.033
I	pre-reactional complexes	94.91	148.508	-426177	2		23.595	22.8205	-21.28	2.315		6.348
J	separated azide, Cu(NH3)2 and iodoalkyne	83.913	236.199	-521741	0					0
J	separated azide and Cu-iodoalkyne pi-complex	96.072	198.144	-521755	1		12.159	11.3404	-13.94	-1.781
J	pre-reactional complexes	109.409	153.759	-521761	2		25.496	24.5671	-20.49	5.006		6.787
K	separated azide, Cu(NH3)2 and iodoalkyne	67.175	247.317	-708506	0					0
K	separated azide and Cu-iodoalkyne pi-complex	79.341	207.298	-708524	1		12.166	11.9257	-18.37	-6.204
K	pre-reactional complexes	93.172	163.481	-708531	2		25.997	24.9831	-25.25	0.747		6.951
L	separated azide, Cu(NH3)2 and iodoalkyne	100.379	242.063	-546386	0					0
L	separated azide and Cu-iodoalkyne pi-complex	112.226	200.308	-546402	1		11.847	12.443	-15.88	-4.033
L	pre-reactional complexes	124.229	166.729	-546405	2		23.85	22.4495	-18.45	5.4		9.433
M	separated azide, Cu(NH3)2 and iodoalkyne	112.977	253.175	-641971	0					0
M	separated azide and Cu-iodoalkyne pi-complex	125.136	215.12	-641985	1		12.159	11.3404	-13.94	-1.781
M	pre-reactional complexes	139.154	167.964	-641989	2		26.177	25.3929	-17.89	8.287		10.068
N	separated azide, Cu(NH3)2 and iodoalkyne	82.702	256.088	-733151	0					0
N	separated azide and Cu-iodoalkyne pi-complex	94.868	216.069	-733169	1		12.166	11.9257	-18.37	-6.204
N	pre-reactional complexes	106.932	179.326	-733174	2		24.23	22.8751	-22.46	1.77		7.974
O	separated azide, Cu(NH3)2 and iodoalkyne	115.906	250.834	-571032	0					0
O	separated azide and Cu-iodoalkyne pi-complex	127.753	209.079	-571048	1		11.847	12.443	-15.88	-4.033
O	pre-reactional complexes	141.32	165.322	-571051	2		25.414	25.4826	-19.55	5.864		9.897
P	separated azide, Cu(NH3)2 and iodoalkyne	128.504	261.946	-666617	0					0
P	separated azide and Cu-iodoalkyne pi-complex	140.663	223.891	-666631	1		12.159	11.3404	-13.94	-1.781
P	pre-reactional complexes	155.171	172.623	-666636	2		26.667	26.6183	-19.29	7.377		9.158

## Sheet: Folha2
uncatalyzed, separated reactants		E	H	G	Cv	Cp	S	sol.energy				Delta (electronic + solvation) energy	DeltaH	DeltaG	enthapy contribution	entropy contribution
A	separated azide, Cu(NH3)2 and iodoalkyne	99.44	101.217	39.574	42.549	48.51	206.749	-376875	0			0	2.24034e-11	0
A	separated azide and Cu-iodoalkyne pi-complex	100.838	102.023	50.492	48.369	52.343	172.834	-376890	1			-15	-14.1887	-4.082	0.81133	10.1067
A	uncatalyzed pre-reactional complex + Cu(NH3)2			46.337			132.491	-376873	2			1.78	-13.5859	8.543	-15.3659	22.1289
A	pre-reactional complexes catalyzed			60.894			139.753	-376896	3			-21.05	-19.6948	0.27	1.35519	19.9648	4.352
B	separated azide, Cu(NH3)2 and iodoalkyne	118.093	119.871	55.14	47.129	53.09	217.106	-401513	0			0	-5.13012e-12	0
B	separated azide and Cu-iodoalkyne pi-complex	119.491	120.677	66.058	52.949	56.923	183.191	-401528	1			-15	-14.1887	-4.082	0.81133	10.1067
B	uncatalyzed pre-reactional complex + Cu(NH3)2			64.857			131.157	-401514	2			-0.96	-16.8558	8.757	-15.8958	25.6128
B	pre-reactional complexes catalyzed			78.17			142.342	-401534	3			-21.42	-20.6697	1.61	0.750328	22.2797	5.692
C	separated azide, Cu(NH3)2 and iodoalkyne	152.219	153.997	84.204	61.049	67.01	234.082	-521744	0			0	2.30358e-11	0
C	separated azide and Cu-iodoalkyne pi-complex	153.617	154.803	95.122	66.869	70.843	200.167	-521759	1			-15	-14.1887	-4.082	0.81133	10.1067
C	uncatalyzed pre-reactional complex + Cu(NH3)2			92.624			152.092	-521741	2			2.29	-13.723	10.71	-16.013	24.433
C	pre-reactional complexes catalyzed			108.368			153.726	-521761	3			-17.08	-16.8621	7.084	0.217912	23.9461	11.166
D	separated azide, Cu(NH3)2 and iodoalkyne	170.36	172.138	99.731	67.137	73.098	242.853	-546389	0			0	-1.19655e-11	0
D	separated azide and Cu-iodoalkyne pi-complex	171.758	172.944	110.649	72.957	76.931	208.938	-546404	1			-15	-14.1887	-4.082	0.81133	10.1067
D	uncatalyzed pre-reactional complex + Cu(NH3)2			107.278			165.533	-546388	2			1.43	-14.0644	8.977	-15.4944	23.0414
D	pre-reactional complexes catalyzed			123.614			164.597	-546407	3			-18.27	-17.7073	5.613	0.562712	23.3203	9.695
E	separated azide, Cu(NH3)2 and iodoalkyne	86.358	88.134	22.545	49.106	55.068	219.984	-563637	0			0	-2.94165e-12	0
E	separated azide and Cu-iodoalkyne pi-complex	87.184	88.368	34.711	52.746	56.721	179.965	-563655	1			-18.37	-18.1297	-6.204	0.240338	11.9257
E	uncatalyzed pre-reactional complex + Cu(NH3)2			33.07			128.996	-563635	2			1.56	-15.0294	12.085	-16.5894	27.1144
E	pre-reactional complexes catalyzed			45.692			147.739	-563661	3			-23.53	-21.912	-0.383	1.61799	21.529	5.821
F	separated azide, Cu(NH3)2 and iodoalkyne	117.995	119.771	55.749	47.316	53.278	214.73	-401518	0			0	-8.79652e-12	0
F	separated azide and Cu-iodoalkyne pi-complex	117.984	119.169	67.596	49.469	53.443	172.975	-401534	1			-15.88	-16.476	-4.033	-0.59599	12.443
F	uncatalyzed pre-reactional complex + Cu(NH3)2			67.308			120.656	-401522	2			-4.73	-21.2051	6.829	-16.4751	28.0341
F	pre-reactional complexes catalyzed			80.231			135.465	-401543	3			-25.15	-24.289	-0.668	0.86103	23.621	3.365
G	separated azide, Cu(NH3)2 and iodoalkyne	133.906	135.682	68.347	56.15	62.111	225.842	-497103	0			0	-1.28466e-11	0
G	separated azide and Cu-iodoalkyne pi-complex	135.311	136.495	80.506	62.01	65.984	187.787	-497117	1			-13.94	-13.1214	-1.781	0.81861	11.3404
G	uncatalyzed pre-reactional complex + Cu(NH3)2			78.867			137.298	-497105	2			-2.49	-18.3561	8.03	-15.8661	26.3861
G	pre-reactional complexes catalyzed			93.754			144.227	-497125	3			-22.84	-21.7543	2.567	1.08573	24.3213	4.348
H	separated azide, Cu(NH3)2 and iodoalkyne	105.011	106.788	38.111	53.686	59.648	230.341	-588275	0			0	2.77396e-11	0
H	separated azide and Cu-iodoalkyne pi-complex	105.837	107.022	50.277	57.326	61.301	190.322	-588293	1			-18.37	-18.1297	-6.204	0.240338	11.9257
H	uncatalyzed pre-reactional complex + Cu(NH3)2			47.95			143.733	-588273	2			1.97	-14.0002	11.809	-15.9702	25.8092
H	pre-reactional complexes catalyzed			62.107			156.033	-588301	3			-25.54	-23.6878	-1.544	1.85222	22.1438	4.66
I	separated azide, Cu(NH3)2 and iodoalkyne	136.648	138.425	71.315	51.896	57.858	225.087	-426156	0			0	2.18705e-11	0
I	separated azide and Cu-iodoalkyne pi-complex	136.637	137.823	83.162	54.049	58.023	183.332	-426172	1			-15.88	-16.476	-4.033	-0.59599	12.443
I	uncatalyzed pre-reactional complex + Cu(NH3)2			80.628			142.441	-426155	2			0.38	-14.9355	9.693	-15.3155	24.6285
I	pre-reactional complexes catalyzed			94.91			148.508	-426177	3			-21.28	-20.5055	2.315	0.774458	22.8205	6.348
J	separated azide, Cu(NH3)2 and iodoalkyne	152.559	154.336	83.913	60.73	66.691	236.199	-521741	0			0	1.78346e-11	0
J	separated azide and Cu-iodoalkyne pi-complex	153.964	155.149	96.072	66.59	70.564	198.144	-521755	1			-13.94	-13.1214	-1.781	0.81861	11.3404
J	uncatalyzed pre-reactional complex + Cu(NH3)2			93.312			153.362	-521740	2			1.11	-14.1764	10.509	-15.2864	24.6854
J	pre-reactional complexes catalyzed			109.409			153.759	-521761	3			-20.49	-19.5611	5.006	0.92888	24.5671	6.787
K	separated azide, Cu(NH3)2 and iodoalkyne	139.137	140.914	67.175	67.606	73.568	247.317	-708506	0			0	5.58913e-11	0
K	separated azide and Cu-iodoalkyne pi-complex	139.963	141.148	79.341	71.246	75.221	207.298	-708524	1			-18.37	-18.1297	-6.204	0.240338	11.9257
K	uncatalyzed pre-reactional complex + Cu(NH3)2			78.182			156.746	-708504	2			1.81	-14.1732	12.817	-15.9832	26.9902
K	pre-reactional complexes catalyzed			93.172			163.481	-708531	3			-25.25	-24.2361	0.747	1.01387	24.9831	6.951
L	separated azide, Cu(NH3)2 and iodoalkyne	170.774	172.551	100.379	65.816	71.778	242.063	-546386	0			0	-8.15703e-12	0
L	separated azide and Cu-iodoalkyne pi-complex	170.763	171.949	112.226	67.969	71.943	200.308	-546402	1			-15.88	-16.476	-4.033	-0.59599	12.443
L	uncatalyzed pre-reactional complex + Cu(NH3)2			110.258			155.02	-546384	2			2.6	-13.4598	12.479	-16.0598	25.9388
L	pre-reactional complexes catalyzed			124.229			166.729	-546405	3			-18.45	-17.0495	5.4	1.40047	22.4495	9.433
M	separated azide, Cu(NH3)2 and iodoalkyne	186.685	188.462	112.977	74.65	80.611	253.175	-641971	0			0	-7.04148e-11	0
M	separated azide and Cu-iodoalkyne pi-complex	188.09	189.275	125.136	80.51	84.484	215.12	-641985	1			-13.94	-13.1214	-1.781	0.81861	11.3404
M	uncatalyzed pre-reactional complex + Cu(NH3)2			122.113			171.004	-641968	2			3.58	-11.771	12.716	-15.351	24.487
M	pre-reactional complexes catalyzed			139.154			167.964	-641989	3			-17.89	-17.1059	8.287	0.784122	25.3929	10.068
N	separated azide, Cu(NH3)2 and iodoalkyne	157.278	159.055	82.702	73.694	79.656	256.088	-733151	0			0	2.09042e-11	0
N	separated azide and Cu-iodoalkyne pi-complex	158.104	159.289	94.868	77.334	81.309	216.069	-733169	1			-18.37	-18.1297	-6.204	0.240338	11.9257
N	uncatalyzed pre-reactional complex + Cu(NH3)2			91.761			173.972	-733149	2			1.72	-13.6916	10.779	-15.4116	24.4706
N	pre-reactional complexes catalyzed			106.932			179.326	-733174	3			-22.46	-21.1051	1.77	1.35492	22.8751	7.974
O	separated azide, Cu(NH3)2 and iodoalkyne	188.915	190.692	115.906	71.904	77.866	250.834	-571032	0			0	-4.31726e-11	0
O	separated azide and Cu-iodoalkyne pi-complex	188.904	190.09	127.753	74.057	78.031	209.079	-571048	1			-15.88	-16.476	-4.033	-0.59599	12.443
O	uncatalyzed pre-reactional complex + Cu(NH3)2			127.124			157.278	-571029	2			2.68	-13.9817	13.898	-16.6617	27.8797
O	pre-reactional complexes catalyzed			141.32			165.322	-571051	3			-19.55	-19.6186	5.864	-0.068576	25.4826	9.897
P	separated azide, Cu(NH3)2 and iodoalkyne	204.826	206.603	128.504	80.738	86.699	261.946	-666617	0			0	1.09992e-11	0
P	separated azide and Cu-iodoalkyne pi-complex	206.231	207.416	140.663	86.598	90.572	223.891	-666631	1			-13.94	-13.1214	-1.781	0.81861	11.3404
P	uncatalyzed pre-reactional complex + Cu(NH3)2			140.344			166.249	-666612	2			4.75	-11.9277	16.59	-16.6777	28.5177
P	pre-reactional complexes catalyzed			155.171			172.623	-666636	3			-19.29	-19.2413	7.377	0.048746	26.6183	9.158
A	separated azide and iodoalkyne	47.088	48.273	8.606	24.62	28.594	133.041	-183281	0			0	8.72546e-12	0
A	pre-reactional complexes			15.369			114.562	-183279	1			1.78	3.03626	8.543	1.25626	5.50674	8.543
B	separated azide and iodoalkyne	65.741	66.927	24.172	29.2	33.174	143.398	-207919	0			0	-1.8801e-11	0
B	pre-reactional complexes			33.889			113.228	-207920	1			-0.96	-0.23366	8.757	0.72634	8.99066	8.757
C	separated azide and iodoalkyne	99.867	101.053	53.236	43.12	47.094	160.374	-328149	0			0	-4.88427e-11	0
C	pre-reactional complexes			61.656			134.163	-328147	1			2.29	2.89912	10.71	0.609122	7.81088	10.71
D	separated azide and iodoalkyne	118.008	119.194	68.763	49.208	53.182	169.145	-352795	0			0	-2.56435e-11	0
D	pre-reactional complexes			76.31			147.604	-352793	1			1.43	2.55778	8.977	1.12778	6.41922	8.977
E	separated azide and iodoalkyne	34.006	35.19	-8.423	31.177	35.152	146.276	-370043	0			0	-1.66267e-11	0
E	pre-reactional complexes			2.102			111.067	-370041	1			1.56	1.59272	12.085	0.032718	10.4923	12.085
F	separated azide and iodoalkyne	65.643	66.827	24.781	29.387	33.362	141.022	-207923	0			0	-2.24816e-11	0
F	pre-reactional complexes			36.34			102.727	-207928	1			-4.73	-4.58291	6.829	0.14709	11.4119	6.829
G	separated azide and iodoalkyne	81.554	82.738	37.379	38.221	42.195	152.134	-303508	0			0	3.16902e-11	0
G	pre-reactional complexes			47.899			119.369	-303511	1			-2.49	-1.73397	8.03	0.75603	9.76397	8.03
H	separated azide and iodoalkyne	52.659	53.844	7.143	35.757	39.732	156.633	-394681	0			0	-4.41531e-11	0
H	pre-reactional complexes			16.982			125.804	-394679	1			1.97	2.62196	11.809	0.651958	9.18704	11.809
I	separated azide and iodoalkyne	84.296	85.481	40.347	33.967	37.942	151.379	-232561	0			0	8.19256e-12	0
I	pre-reactional complexes			49.66			124.512	-232561	1			0.38	1.68663	9.693	1.30663	8.00637	9.693
J	separated azide and iodoalkyne	100.207	101.392	52.945	42.801	46.775	162.491	-328146	0			0	4.16378e-12	0
J	pre-reactional complexes			62.344			135.433	-328145	1			1.11	2.44572	10.509	1.33572	8.06328	10.509
K	separated azide and iodoalkyne	86.785	87.97	36.207	49.677	53.652	173.609	-514911	0			0	-1.59801e-11	0
K	pre-reactional complexes			47.214			138.817	-514909	1			1.81	2.44898	12.817	0.638984	10.368	12.817
L	separated azide and iodoalkyne	118.422	119.607	69.411	47.887	51.862	168.355	-352792	0			0	3.63656e-11	0
L	pre-reactional complexes			79.29			137.091	-352789	1			2.6	3.16233	12.479	0.562328	9.31667	12.479
M	separated azide and iodoalkyne	134.333	135.518	82.009	56.721	60.695	179.467	-448377	0			0	3.23368e-11	0
M	pre-reactional complexes			91.145			153.075	-448373	1			3.58	4.85118	12.716	1.27118	7.86482	12.716
N	separated azide and iodoalkyne	104.926	106.111	51.734	55.765	59.74	182.38	-539557	0			0	6.54197e-11	0
N	pre-reactional complexes			60.793			156.043	-539555	1			1.72	2.93057	10.779	1.21057	7.84843	10.779
O	separated azide and iodoalkyne	136.563	137.748	84.938	53.975	57.95	177.126	-377437	0			0	1.35714e-12	0
O	pre-reactional complexes			96.156			139.349	-377435	1			2.68	2.64045	13.898	-0.039546	11.2575	13.898
P	separated azide and iodoalkyne	152.474	153.659	97.536	62.809	66.783	188.238	-473022	0			0	-2.67875e-12	0
P	pre-reactional complexes			109.376			148.32	-473018	1			4.75	4.69444	16.59	-0.055564	11.8956	16.59

## Sheet: Folha3
uncatalyzed, separated reactants		E	H	G	Cv	Cp	S	sol.energy				Delta (electronic + solvation) energy	DeltaH	DeltaG	enthapy contribution	entropy contribution
A	separated azide, Cu(NH3)2 and iodoalkyne	99.44	101.217	39.574	42.549	48.51	206.749	-376875	0			0	2.24034e-11	0
A	separated azide and Cu-iodoalkyne pi-complex	100.838	102.023	50.492	48.369	52.343	172.834	-376890	1			-15	-14.1887	-4.082	0.81133	10.1067
A	uncatalyzed pre-reactional complex + Cu(NH3)2			46.337			132.491	-376873	2			1.78	-13.5859	8.543	-15.3659	22.1289
A	pre-reactional complexes catalyzed			60.894			139.753	-376896	3			-21.05	-19.6948	0.27	1.35519	19.9648	4.352
B	separated azide, Cu(NH3)2 and iodoalkyne	118.093	119.871	55.14	47.129	53.09	217.106	-401513	0			0	-5.13012e-12	0
B	separated azide and Cu-iodoalkyne pi-complex	119.491	120.677	66.058	52.949	56.923	183.191	-401528	1			-15	-14.1887	-4.082	0.81133	10.1067
B	uncatalyzed pre-reactional complex + Cu(NH3)2			64.857			131.157	-401514	2			-0.96	-16.8558	8.757	-15.8958	25.6128
B	pre-reactional complexes catalyzed			78.17			142.342	-401534	3			-21.42	-20.6697	1.61	0.750328	22.2797	5.692
C	separated azide, Cu(NH3)2 and iodoalkyne	152.219	153.997	84.204	61.049	67.01	234.082	-521744	0			0	2.30358e-11	0
C	separated azide and Cu-iodoalkyne pi-complex	153.617	154.803	95.122	66.869	70.843	200.167	-521759	1			-15	-14.1887	-4.082	0.81133	10.1067
C	uncatalyzed pre-reactional complex + Cu(NH3)2			92.624			152.092	-521741	2			2.29	-13.723	10.71	-16.013	24.433
C	pre-reactional complexes catalyzed			108.368			153.726	-521761	3			-17.08	-16.8621	7.084	0.217912	23.9461	11.166
D	separated azide, Cu(NH3)2 and iodoalkyne	170.36	172.138	99.731	67.137	73.098	242.853	-546389	0			0	-1.19655e-11	0
D	separated azide and Cu-iodoalkyne pi-complex	171.758	172.944	110.649	72.957	76.931	208.938	-546404	1			-15	-14.1887	-4.082	0.81133	10.1067
D	uncatalyzed pre-reactional complex + Cu(NH3)2			107.278			165.533	-546388	2			1.43	-14.0644	8.977	-15.4944	23.0414
D	pre-reactional complexes catalyzed			123.614			164.597	-546407	3			-18.27	-17.7073	5.613	0.562712	23.3203	9.695
E	separated azide, Cu(NH3)2 and iodoalkyne	86.358	88.134	22.545	49.106	55.068	219.984	-563637	0			0	-2.94165e-12	0
E	separated azide and Cu-iodoalkyne pi-complex	87.184	88.368	34.711	52.746	56.721	179.965	-563655	1			-18.37	-18.1297	-6.204	0.240338	11.9257
E	uncatalyzed pre-reactional complex + Cu(NH3)2			33.07			128.996	-563635	2			1.56	-15.0294	12.085	-16.5894	27.1144
E	pre-reactional complexes catalyzed			45.692			147.739	-563661	3			-23.53	-21.912	-0.383	1.61799	21.529	5.821
F	separated azide, Cu(NH3)2 and iodoalkyne	117.995	119.771	55.749	47.316	53.278	214.73	-401518	0			0	-8.79652e-12	0
F	separated azide and Cu-iodoalkyne pi-complex	117.984	119.169	67.596	49.469	53.443	172.975	-401534	1			-15.88	-16.476	-4.033	-0.59599	12.443
F	uncatalyzed pre-reactional complex + Cu(NH3)2			67.308			120.656	-401522	2			-4.73	-21.2051	6.829	-16.4751	28.0341
F	pre-reactional complexes catalyzed			80.231			135.465	-401543	3			-25.15	-24.289	-0.668	0.86103	23.621	3.365
G	separated azide, Cu(NH3)2 and iodoalkyne	133.906	135.682	68.347	56.15	62.111	225.842	-497103	0			0	-1.28466e-11	0
G	separated azide and Cu-iodoalkyne pi-complex	135.311	136.495	80.506	62.01	65.984	187.787	-497117	1			-13.94	-13.1214	-1.781	0.81861	11.3404
G	uncatalyzed pre-reactional complex + Cu(NH3)2			78.867			137.298	-497105	2			-2.49	-18.3561	8.03	-15.8661	26.3861
G	pre-reactional complexes catalyzed			93.754			144.227	-497125	3			-22.84	-21.7543	2.567	1.08573	24.3213	4.348
H	separated azide, Cu(NH3)2 and iodoalkyne	105.011	106.788	38.111	53.686	59.648	230.341	-588275	0			0	2.77396e-11	0
H	separated azide and Cu-iodoalkyne pi-complex	105.837	107.022	50.277	57.326	61.301	190.322	-588293	1			-18.37	-18.1297	-6.204	0.240338	11.9257
H	uncatalyzed pre-reactional complex + Cu(NH3)2			47.95			143.733	-588273	2			1.97	-14.0002	11.809	-15.9702	25.8092
H	pre-reactional complexes catalyzed			62.107			156.033	-588301	3			-25.54	-23.6878	-1.544	1.85222	22.1438	4.66
I	separated azide, Cu(NH3)2 and iodoalkyne	136.648	138.425	71.315	51.896	57.858	225.087	-426156	0			0	2.18705e-11	0
I	separated azide and Cu-iodoalkyne pi-complex	136.637	137.823	83.162	54.049	58.023	183.332	-426172	1			-15.88	-16.476	-4.033	-0.59599	12.443
I	uncatalyzed pre-reactional complex + Cu(NH3)2			80.628			142.441	-426155	2			0.38	-14.9355	9.693	-15.3155	24.6285
I	pre-reactional complexes catalyzed			94.91			148.508	-426177	3			-21.28	-20.5055	2.315	0.774458	22.8205	6.348
J	separated azide, Cu(NH3)2 and iodoalkyne	152.559	154.336	83.913	60.73	66.691	236.199	-521741	0			0	1.78346e-11	0
J	separated azide and Cu-iodoalkyne pi-complex	153.964	155.149	96.072	66.59	70.564	198.144	-521755	1			-13.94	-13.1214	-1.781	0.81861	11.3404
J	uncatalyzed pre-reactional complex + Cu(NH3)2			93.312			153.362	-521740	2			1.11	-14.1764	10.509	-15.2864	24.6854
J	pre-reactional complexes catalyzed			109.409			153.759	-521761	3			-20.49	-19.5611	5.006	0.92888	24.5671	6.787
K	separated azide, Cu(NH3)2 and iodoalkyne	139.137	140.914	67.175	67.606	73.568	247.317	-708506	0			0	5.58913e-11	0
K	separated azide and Cu-iodoalkyne pi-complex	139.963	141.148	79.341	71.246	75.221	207.298	-708524	1			-18.37	-18.1297	-6.204	0.240338	11.9257
K	uncatalyzed pre-reactional complex + Cu(NH3)2			78.182			156.746	-708504	2			1.81	-14.1732	12.817	-15.9832	26.9902
K	pre-reactional complexes catalyzed			93.172			163.481	-708531	3			-25.25	-24.2361	0.747	1.01387	24.9831	6.951
L	separated azide, Cu(NH3)2 and iodoalkyne	170.774	172.551	100.379	65.816	71.778	242.063	-546386	0			0	-8.15703e-12	0
L	separated azide and Cu-iodoalkyne pi-complex	170.763	171.949	112.226	67.969	71.943	200.308	-546402	1			-15.88	-16.476	-4.033	-0.59599	12.443
L	uncatalyzed pre-reactional complex + Cu(NH3)2			110.258			155.02	-546384	2			2.6	-13.4598	12.479	-16.0598	25.9388
L	pre-reactional complexes catalyzed			124.229			166.729	-546405	3			-18.45	-17.0495	5.4	1.40047	22.4495	9.433
M	separated azide, Cu(NH3)2 and iodoalkyne	186.685	188.462	112.977	74.65	80.611	253.175	-641971	0			0	-7.04148e-11	0
M	separated azide and Cu-iodoalkyne pi-complex	188.09	189.275	125.136	80.51	84.484	215.12	-641985	1			-13.94	-13.1214	-1.781	0.81861	11.3404
M	uncatalyzed pre-reactional complex + Cu(NH3)2			122.113			171.004	-641968	2			3.58	-11.771	12.716	-15.351	24.487
M	pre-reactional complexes catalyzed			139.154			167.964	-641989	3			-17.89	-17.1059	8.287	0.784122	25.3929	10.068
N	separated azide, Cu(NH3)2 and iodoalkyne	157.278	159.055	82.702	73.694	79.656	256.088	-733151	0			0	2.09042e-11	0
N	separated azide and Cu-iodoalkyne pi-complex	158.104	159.289	94.868	77.334	81.309	216.069	-733169	1			-18.37	-18.1297	-6.204	0.240338	11.9257
N	uncatalyzed pre-reactional complex + Cu(NH3)2			91.761			173.972	-733149	2			1.72	-13.6916	10.779	-15.4116	24.4706
N	pre-reactional complexes catalyzed			106.932			179.326	-733174	3			-22.46	-21.1051	1.77	1.35492	22.8751	7.974
O	separated azide, Cu(NH3)2 and iodoalkyne	188.915	190.692	115.906	71.904	77.866	250.834	-571032	0			0	-4.31726e-11	0
O	separated azide and Cu-iodoalkyne pi-complex	188.904	190.09	127.753	74.057	78.031	209.079	-571048	1			-15.88	-16.476	-4.033	-0.59599	12.443
O	uncatalyzed pre-reactional complex + Cu(NH3)2			127.124			157.278	-571029	2			2.68	-13.9817	13.898	-16.6617	27.8797
O	pre-reactional complexes catalyzed			141.32			165.322	-571051	3			-19.55	-19.6186	5.864	-0.068576	25.4826	9.897
P	separated azide, Cu(NH3)2 and iodoalkyne	204.826	206.603	128.504	80.738	86.699	261.946	-666617	0			0	1.09992e-11	0
P	separated azide and Cu-iodoalkyne pi-complex	206.231	207.416	140.663	86.598	90.572	223.891	-666631	1			-13.94	-13.1214	-1.781	0.81861	11.3404
P	uncatalyzed pre-reactional complex + Cu(NH3)2			140.344			166.249	-666612	2			4.75	-11.9277	16.59	-16.6777	28.5177
P	pre-reactional complexes catalyzed			155.171			172.623	-666636	3			-19.29	-19.2413	7.377	0.048746	26.6183	9.158
A	separated azide and iodoalkyne	47.088	48.273	8.606	24.62	28.594	133.041	-183281	0			0	8.72546e-12	0
A	pre-reactional complexes			15.369			114.562	-183279	3			1.78	3.03626	8.543	1.25626	5.50674	8.543
B	separated azide and iodoalkyne	65.741	66.927	24.172	29.2	33.174	143.398	-207919	0			0	-1.8801e-11	0
B	pre-reactional complexes			33.889			113.228	-207920	3			-0.96	-0.23366	8.757	0.72634	8.99066	8.757
C	separated azide and iodoalkyne	99.867	101.053	53.236	43.12	47.094	160.374	-328149	0			0	-4.88427e-11	0
C	pre-reactional complexes			61.656			134.163	-328147	3			2.29	2.89912	10.71	0.609122	7.81088	10.71
D	separated azide and iodoalkyne	118.008	119.194	68.763	49.208	53.182	169.145	-352795	0			0	-2.56435e-11	0
D	pre-reactional complexes			76.31			147.604	-352793	3			1.43	2.55778	8.977	1.12778	6.41922	8.977
E	separated azide and iodoalkyne	34.006	35.19	-8.423	31.177	35.152	146.276	-370043	0			0	-1.66267e-11	0
E	pre-reactional complexes			2.102			111.067	-370041	3			1.56	1.59272	12.085	0.032718	10.4923	12.085
F	separated azide and iodoalkyne	65.643	66.827	24.781	29.387	33.362	141.022	-207923	0			0	-2.24816e-11	0
F	pre-reactional complexes			36.34			102.727	-207928	3			-4.73	-4.58291	6.829	0.14709	11.4119	6.829
G	separated azide and iodoalkyne	81.554	82.738	37.379	38.221	42.195	152.134	-303508	0			0	3.16902e-11	0
G	pre-reactional complexes			47.899			119.369	-303511	3			-2.49	-1.73397	8.03	0.75603	9.76397	8.03
H	separated azide and iodoalkyne	52.659	53.844	7.143	35.757	39.732	156.633	-394681	0			0	-4.41531e-11	0
H	pre-reactional complexes			16.982			125.804	-394679	3			1.97	2.62196	11.809	0.651958	9.18704	11.809
I	separated azide and iodoalkyne	84.296	85.481	40.347	33.967	37.942	151.379	-232561	0			0	8.19256e-12	0
I	pre-reactional complexes			49.66			124.512	-232561	3			0.38	1.68663	9.693	1.30663	8.00637	9.693
J	separated azide and iodoalkyne	100.207	101.392	52.945	42.801	46.775	162.491	-328146	0			0	4.16378e-12	0
J	pre-reactional complexes			62.344			135.433	-328145	3			1.11	2.44572	10.509	1.33572	8.06328	10.509
K	separated azide and iodoalkyne	86.785	87.97	36.207	49.677	53.652	173.609	-514911	0			0	-1.59801e-11	0
K	pre-reactional complexes			47.214			138.817	-514909	3			1.81	2.44898	12.817	0.638984	10.368	12.817
L	separated azide and iodoalkyne	118.422	119.607	69.411	47.887	51.862	168.355	-352792	0			0	3.63656e-11	0
L	pre-reactional complexes			79.29			137.091	-352789	3			2.6	3.16233	12.479	0.562328	9.31667	12.479
M	separated azide and iodoalkyne	134.333	135.518	82.009	56.721	60.695	179.467	-448377	0			0	3.23368e-11	0
M	pre-reactional complexes			91.145			153.075	-448373	3			3.58	4.85118	12.716	1.27118	7.86482	12.716
N	separated azide and iodoalkyne	104.926	106.111	51.734	55.765	59.74	182.38	-539557	0			0	6.54197e-11	0
N	pre-reactional complexes			60.793			156.043	-539555	3			1.72	2.93057	10.779	1.21057	7.84843	10.779
O	separated azide and iodoalkyne	136.563	137.748	84.938	53.975	57.95	177.126	-377437	0			0	1.35714e-12	0
O	pre-reactional complexes			96.156			139.349	-377435	3			2.68	2.64045	13.898	-0.039546	11.2575	13.898
P	separated azide and iodoalkyne	152.474	153.659	97.536	62.809	66.783	188.238	-473022	0			0	-2.67875e-12	0
P	pre-reactional complexes			109.376			148.32	-473018	3			4.75	4.69444	16.59	-0.055564	11.8956	16.59
B	Uncatalyzed_synthesis_of_4-iodotriazoles			36.707				-207904	3.5
C	Uncatalyzed_synthesis_of_4-iodotriazoles			65.615				-328137	3.5
D	Uncatalyzed_synthesis_of_4-iodotriazoles			81.161				-352782	3.5
E	Uncatalyzed_synthesis_of_4-iodotriazoles			4.199				-370033	3.5
F	Uncatalyzed_synthesis_of_4-iodotriazoles			36.919				-207910	3.5
G	Uncatalyzed_synthesis_of_4-iodotriazoles			49.771				-303495	3.5
H	Uncatalyzed_synthesis_of_4-iodotriazoles			20.478				-394673	3.5
I	Uncatalyzed_synthesis_of_4-iodotriazoles			52.824				-232549	3.5
J	Uncatalyzed_synthesis_of_4-iodotriazoles			65.606				-328134	3.5
K	Uncatalyzed_synthesis_of_4-iodotriazoles			49.67				-514902	3.5
L	Uncatalyzed_synthesis_of_4-iodotriazoles			82.019				-352779	3.5
M	Uncatalyzed_synthesis_of_4-iodotriazoles			95.733				-448363	3.5
N	Uncatalyzed_synthesis_of_4-iodotriazoles			65.302				-539547	3.5
O	Uncatalyzed_synthesis_of_4-iodotriazoles			97.03				-377425	3.5
P	Uncatalyzed_synthesis_of_4-iodotriazoles			110.054				-473009	3.5
A	Uncatalyzed_synthesis_of_4-iodotriazoles			20.923				-183268	3.5
B	Uncatalyzed_synthesis_of_5-iodotriazoles			36.96				-207907	3.5
C	Uncatalyzed_synthesis_of_5-iodotriazoles			65.581				-328137	3.5
D	Uncatalyzed_synthesis_of_5-iodotriazoles			81.533				-352782	3.5
E	Uncatalyzed_synthesis_of_5-iodotriazoles			4.046				-370033	3.5
F	Uncatalyzed_synthesis_of_5-iodotriazoles			36.869				-207910	3.5
G	Uncatalyzed_synthesis_of_5-iodotriazoles			49.647				-303494	3.5
H	Uncatalyzed_synthesis_of_5-iodotriazoles			20.253				-394673	3.5
I	Uncatalyzed_synthesis_of_5-iodotriazoles			53.058				-232549	3.5
J	Uncatalyzed_synthesis_of_5-iodotriazoles			65.417				-328134	3.5
K	Uncatalyzed_synthesis_of_5-iodotriazoles			49.03				-514901	3.5
L	Uncatalyzed_synthesis_of_5-iodotriazoles			81.898				-352779	3.5
M	Uncatalyzed_synthesis_of_5-iodotriazoles			96.488				-448363	3.5
N	Uncatalyzed_synthesis_of_5-iodotriazoles			65.011				-539547	3.5
O	Uncatalyzed_synthesis_of_5-iodotriazoles			97.837				-377425	3.5
P	Uncatalyzed_synthesis_of_5-iodotriazoles			111.251				-473009	3.5
A	Uncatalyzed_synthesis_of_5-iodotriazoles			20.929				-183268	3.5
A	4-iodotriazole_synthesis_initiated_by_attack_of_the_azide_distal_nitrogen			64.281				-376877	3.5
B	4-iodotriazole_synthesis_initiated_by_attack_of_the_azide_distal_nitrogen			79.741				-401516	3.5
C	4-iodotriazole_synthesis_initiated_by_attack_of_the_azide_distal_nitrogen			108.729				-521747	3.5
D	4-iodotriazole_synthesis_initiated_by_attack_of_the_azide_distal_nitrogen			124.734				-546391	3.5
E	4-iodotriazole_synthesis_initiated_by_attack_of_the_azide_distal_nitrogen			48.079				-563639	3.5
F	4-iodotriazole_synthesis_initiated_by_attack_of_the_azide_distal_nitrogen			80.847				-401522	3.5
G	4-iodotriazole_synthesis_initiated_by_attack_of_the_azide_distal_nitrogen			93.599				-497108	3.5
H	4-iodotriazole_synthesis_initiated_by_attack_of_the_azide_distal_nitrogen			63.538				-588276	3.5
I	4-iodotriazole_synthesis_initiated_by_attack_of_the_azide_distal_nitrogen			96.443				-426159	3.5
J	4-iodotriazole_synthesis_initiated_by_attack_of_the_azide_distal_nitrogen			108.864				-521745	3.5
K	4-iodotriazole_synthesis_initiated_by_attack_of_the_azide_distal_nitrogen			92.137				-708506	3.5
L	4-iodotriazole_synthesis_initiated_by_attack_of_the_azide_distal_nitrogen			125.234				-546390	3.5
M	4-iodotriazole_synthesis_initiated_by_attack_of_the_azide_distal_nitrogen			140.881				-641976	3.5
N	4-iodotriazole_synthesis_initiated_by_attack_of_the_azide_distal_nitrogen			106.943				-733155	3.5
O	4-iodotriazole_synthesis_initiated_by_attack_of_the_azide_distal_nitrogen			140.49				-571036	3.5
P	4-iodotriazole_synthesis_initiated_by_attack_of_the_azide_distal_nitrogen			156.362				-666623	3.5
A	4-iodotriazole_synthesis_initiated_by_attack_of_the_azide_proximal_nitrogen			64.27				-376873	3.5
B	4-iodotriazole_synthesis_initiated_by_attack_of_the_azide_proximal_nitrogen			80.168				-401513	3.5
C	4-iodotriazole_synthesis_initiated_by_attack_of_the_azide_proximal_nitrogen			109.846				-521740	3.5
D	4-iodotriazole_synthesis_initiated_by_attack_of_the_azide_proximal_nitrogen			125.383				-546385	3.5
E	4-iodotriazole_synthesis_initiated_by_attack_of_the_azide_proximal_nitrogen			48.39				-563642	3.5
F	4-iodotriazole_synthesis_initiated_by_attack_of_the_azide_proximal_nitrogen			80.283				-401517	3.5
G	4-iodotriazole_synthesis_initiated_by_attack_of_the_azide_proximal_nitrogen			93.289				-497102	3.5
H	4-iodotriazole_synthesis_initiated_by_attack_of_the_azide_proximal_nitrogen			64.326				-588281	3.5
I	4-iodotriazole_synthesis_initiated_by_attack_of_the_azide_proximal_nitrogen			96.237				-426156	3.5
J	4-iodotriazole_synthesis_initiated_by_attack_of_the_azide_proximal_nitrogen			109.799				-521741	3.5
K	4-iodotriazole_synthesis_initiated_by_attack_of_the_azide_proximal_nitrogen			93.329				-708504	3.5
L	4-iodotriazole_synthesis_initiated_by_attack_of_the_azide_proximal_nitrogen			126.218				-546381	3.5
M	4-iodotriazole_synthesis_initiated_by_attack_of_the_azide_proximal_nitrogen			140.625				-641969	3.5
N	4-iodotriazole_synthesis_initiated_by_attack_of_the_azide_proximal_nitrogen			108.005				-733149	3.5
O	4-iodotriazole_synthesis_initiated_by_attack_of_the_azide_proximal_nitrogen			141.777				-571029	3.5
P	4-iodotriazole_synthesis_initiated_by_attack_of_the_azide_proximal_nitrogen			153.947				-666614	3.5
A	5-iodotriazole_synthesis_initiated_by_attack_of_the_azide_distal_nitrogen			64.284				-376882	3.5
B	5-iodotriazole_synthesis_initiated_by_attack_of_the_azide_distal_nitrogen			80.083				-401517	3.5
C	5-iodotriazole_synthesis_initiated_by_attack_of_the_azide_distal_nitrogen			109.32				-521749	3.5
D	5-iodotriazole_synthesis_initiated_by_attack_of_the_azide_distal_nitrogen			124.978				-546395	3.5
E	5-iodotriazole_synthesis_initiated_by_attack_of_the_azide_distal_nitrogen			48.776				-563647	3.5
F	5-iodotriazole_synthesis_initiated_by_attack_of_the_azide_distal_nitrogen			80.579				-401527	3.5
G	5-iodotriazole_synthesis_initiated_by_attack_of_the_azide_distal_nitrogen			94.122				-497108	3.5
H	5-iodotriazole_synthesis_initiated_by_attack_of_the_azide_distal_nitrogen			64.294				-588284	3.5
I	5-iodotriazole_synthesis_initiated_by_attack_of_the_azide_distal_nitrogen			96.72				-426162	3.5
J	5-iodotriazole_synthesis_initiated_by_attack_of_the_azide_distal_nitrogen			109.368				-521744	3.5
K	5-iodotriazole_synthesis_initiated_by_attack_of_the_azide_distal_nitrogen			97.28				-708513	3.5
L	5-iodotriazole_synthesis_initiated_by_attack_of_the_azide_distal_nitrogen			126.114				-546393	3.5
M	5-iodotriazole_synthesis_initiated_by_attack_of_the_azide_distal_nitrogen			140.453				-641976	3.5
N	5-iodotriazole_synthesis_initiated_by_attack_of_the_azide_distal_nitrogen			110.11				-733158	3.5
O	5-iodotriazole_synthesis_initiated_by_attack_of_the_azide_distal_nitrogen			143.314				-571037	3.5
P	5-iodotriazole_synthesis_initiated_by_attack_of_the_azide_distal_nitrogen			154.036				-666621	3.5
A	5-iodotriazole_synthesis_initiated_by_attack_of_the_azide_proximal_nitrogen			63.243				-376873	3.5
B	5-iodotriazole_synthesis_initiated_by_attack_of_the_azide_proximal_nitrogen			79.633				-401512	3.5
C	5-iodotriazole_synthesis_initiated_by_attack_of_the_azide_proximal_nitrogen			108.975				-521738	3.5
D	5-iodotriazole_synthesis_initiated_by_attack_of_the_azide_proximal_nitrogen			123.789				-546383	3.5
E	5-iodotriazole_synthesis_initiated_by_attack_of_the_azide_proximal_nitrogen			47.66				-563637	3.5
F	5-iodotriazole_synthesis_initiated_by_attack_of_the_azide_proximal_nitrogen			79.479				-401515	3.5
G	5-iodotriazole_synthesis_initiated_by_attack_of_the_azide_proximal_nitrogen			93.578				-497100	3.5
H	5-iodotriazole_synthesis_initiated_by_attack_of_the_azide_proximal_nitrogen			63.793				-588277	3.5
I	5-iodotriazole_synthesis_initiated_by_attack_of_the_azide_proximal_nitrogen			96.266				-426154	3.5
J	5-iodotriazole_synthesis_initiated_by_attack_of_the_azide_proximal_nitrogen			109.573				-521741	3.5
K	5-iodotriazole_synthesis_initiated_by_attack_of_the_azide_proximal_nitrogen			93.377				-708502	3.5
L	5-iodotriazole_synthesis_initiated_by_attack_of_the_azide_proximal_nitrogen			126.214				-546380	3.5
M	5-iodotriazole_synthesis_initiated_by_attack_of_the_azide_proximal_nitrogen			139.435				-641967	3.5
N	5-iodotriazole_synthesis_initiated_by_attack_of_the_azide_proximal_nitrogen			108.678				-733149	3.5
O	5-iodotriazole_synthesis_initiated_by_attack_of_the_azide_proximal_nitrogen			140.098				-571026	3.5
P	5-iodotriazole_synthesis_initiated_by_attack_of_the_azide_proximal_nitrogen			155.686				-666609	3.5
A	Concerted_mechanism_of_synthesis_of_4-iodotriazoles			63.395				-376879	3.5
B	Concerted_mechanism_of_synthesis_of_4-iodotriazoles			78.484				-401517	3.5
C	Concerted_mechanism_of_synthesis_of_4-iodotriazoles			108.874				-521746	3.5
D	Concerted_mechanism_of_synthesis_of_4-iodotriazoles			124.341				-546391	3.5
E	Concerted_mechanism_of_synthesis_of_4-iodotriazoles			47.951				-563647	3.5
F	Concerted_mechanism_of_synthesis_of_4-iodotriazoles			79.577				-401521	3.5
G	Concerted_mechanism_of_synthesis_of_4-iodotriazoles			92.718				-497109	3.5
H	Concerted_mechanism_of_synthesis_of_4-iodotriazoles			64.506				-588285	3.5
I	Concerted_mechanism_of_synthesis_of_4-iodotriazoles			95.17				-426159	3.5
J	Concerted_mechanism_of_synthesis_of_4-iodotriazoles			107.76				-521745	3.5
K	Concerted_mechanism_of_synthesis_of_4-iodotriazoles			93.26				-708514	3.5
L	Concerted_mechanism_of_synthesis_of_4-iodotriazoles			123.397				-546388	3.5
M	Concerted_mechanism_of_synthesis_of_4-iodotriazoles			138.652				-641971	3.5
N	Concerted_mechanism_of_synthesis_of_4-iodotriazoles			108.62				-733159	3.5
O	Concerted_mechanism_of_synthesis_of_4-iodotriazoles			138.051				-571033	3.5
P	Concerted_mechanism_of_synthesis_of_4-iodotriazoles			153.981				-666616	3.5
A	Concerted_mechanism_of_synthesis_of_5-iodotriazoles			63.089				-376879	3.5
B	Concerted_mechanism_of_synthesis_of_5-iodotriazoles			79.099				-401518	3.5
C	Concerted_mechanism_of_synthesis_of_5-iodotriazoles			110.514				-521746	3.5
D	Concerted_mechanism_of_synthesis_of_5-iodotriazoles			125.675				-546391	3.5
E	Concerted_mechanism_of_synthesis_of_5-iodotriazoles			47.89				-563648	3.5
F	Concerted_mechanism_of_synthesis_of_5-iodotriazoles			79.311				-401521	3.5
G	Concerted_mechanism_of_synthesis_of_5-iodotriazoles			92.863				-497108	3.5
H	Concerted_mechanism_of_synthesis_of_5-iodotriazoles			63.726				-588287	3.5
I	Concerted_mechanism_of_synthesis_of_5-iodotriazoles			95.512				-426160	3.5
J	Concerted_mechanism_of_synthesis_of_5-iodotriazoles			109.017				-521747	3.5
K	Concerted_mechanism_of_synthesis_of_5-iodotriazoles			93.918				-708514	3.5
L	Concerted_mechanism_of_synthesis_of_5-iodotriazoles			124.08				-546388	3.5
M	Concerted_mechanism_of_synthesis_of_5-iodotriazoles			138.9				-641975	3.5
N	Concerted_mechanism_of_synthesis_of_5-iodotriazoles			108.534				-733160	3.5
O	Concerted_mechanism_of_synthesis_of_5-iodotriazoles			139.294				-571034	3.5
P	Concerted_mechanism_of_synthesis_of_5-iodotriazoles			154.808				-666621	3.5

## Sheet: Folha4
uncatalyzed, separated reactants		E	H	G	Cv	Cp	S	sol.energy			Delta sol energy	Delta free energy in solution (w/ vib, rot, trans contribs to Delta G)
A	separated azide, Cu(NH3)2 and iodoalkyne	99.44	101.217	39.574	42.549	48.51	206.749	-376875	-376835	0	0	0
A	separated azide and Cu-iodoalkyne pi-complex	100.838	102.023	50.492	48.369	52.343	172.834	-376890	-376839	1	-15	-4.082
A	uncatalyzed pre-reactional complex + Cu(NH3)2			46.337			132.491	-376873	-376827	2	1.78	8.543
A	pre-reactional complexes catalyzed			60.894			139.753	-376896	-376835	3	-21.05	0.27
A	5-iodotriazole_synthesis_initiated_by_attack_of_the_azide_distal_nitrogen			64.284				-376882	-376817	3.5	-6.58	18.13
A	Concerted_mechanism_of_synthesis_of_5-iodotriazoles			63.089				-376879	-376816	3.5	-3.71	19.805
A	Concerted_mechanism_of_synthesis_of_4-iodotriazoles			63.395				-376879	-376815	3.5	-3.68	20.141
A	4-iodotriazole_synthesis_initiated_by_attack_of_the_azide_distal_nitrogen			64.281				-376877	-376813	3.5	-2.46	22.247
A	5-iodotriazole_synthesis_initiated_by_attack_of_the_azide_proximal_nitrogen			63.243				-376873	-376809	3.5	2.43	26.099
A	4-iodotriazole_synthesis_initiated_by_attack_of_the_azide_proximal_nitrogen			64.27				-376873	-376809	3.5	1.57	26.266
B	separated azide, Cu(NH3)2 and iodoalkyne	118.093	119.871	55.14	47.129	53.09	217.106	-401513	-401458	0	0	0
B	separated azide and Cu-iodoalkyne pi-complex	119.491	120.677	66.058	52.949	56.923	183.191	-401528	-401462	1	-15	-4.082
B	uncatalyzed pre-reactional complex + Cu(NH3)2			64.857			131.157	-401514	-401449	2	-0.96	8.757
B	pre-reactional complexes catalyzed			78.17			142.342	-401534	-401456	3	-21.42	1.61
B	Concerted_mechanism_of_synthesis_of_4-iodotriazoles			78.484				-401517	-401439	3.5	-4.27	19.074
B	Concerted_mechanism_of_synthesis_of_5-iodotriazoles			79.099				-401518	-401439	3.5	-4.74	19.219
B	5-iodotriazole_synthesis_initiated_by_attack_of_the_azide_distal_nitrogen			80.083				-401517	-401436	3.5	-3.54	21.403
B	4-iodotriazole_synthesis_initiated_by_attack_of_the_azide_distal_nitrogen			79.741				-401516	-401436	3.5	-2.88	21.721
B	4-iodotriazole_synthesis_initiated_by_attack_of_the_azide_proximal_nitrogen			80.168				-401513	-401433	3.5	0.17	25.198
B	5-iodotriazole_synthesis_initiated_by_attack_of_the_azide_proximal_nitrogen			79.633				-401512	-401432	3.5	0.99	25.483
C	separated azide, Cu(NH3)2 and iodoalkyne	152.219	153.997	84.204	61.049	67.01	234.082	-521744	-521659	0	0	0
C	separated azide and Cu-iodoalkyne pi-complex	153.617	154.803	95.122	66.869	70.843	200.167	-521759	-521663	1	-15	-4.082
C	uncatalyzed pre-reactional complex + Cu(NH3)2			92.624			152.092	-521741	-521649	2	2.29	10.71
C	pre-reactional complexes catalyzed			108.368			153.726	-521761	-521652	3	-17.08	7.084
C	5-iodotriazole_synthesis_initiated_by_attack_of_the_azide_distal_nitrogen			109.32				-521749	-521640	3.5	-5.27	19.846
C	4-iodotriazole_synthesis_initiated_by_attack_of_the_azide_distal_nitrogen			108.729				-521747	-521639	3.5	-3.82	20.705
C	Concerted_mechanism_of_synthesis_of_4-iodotriazoles			108.874				-521746	-521637	3.5	-1.97	22.7
C	Concerted_mechanism_of_synthesis_of_5-iodotriazoles			110.514				-521746	-521635	3.5	-2.01	24.3
C	4-iodotriazole_synthesis_initiated_by_attack_of_the_azide_proximal_nitrogen			109.846				-521740	-521631	3.5	3.16	28.802
C	5-iodotriazole_synthesis_initiated_by_attack_of_the_azide_proximal_nitrogen			108.975				-521738	-521629	3.5	5.12	29.891
D	separated azide, Cu(NH3)2 and iodoalkyne	170.36	172.138	99.731	67.137	73.098	242.853	-546389	-546289	0	0	0
D	separated azide and Cu-iodoalkyne pi-complex	171.758	172.944	110.649	72.957	76.931	208.938	-546404	-546293	1	-15	-4.082
D	uncatalyzed pre-reactional complex + Cu(NH3)2			107.278			165.533	-546388	-546280	2	1.43	8.977
D	pre-reactional complexes catalyzed			123.614			164.597	-546407	-546284	3	-18.27	5.613
D	5-iodotriazole_synthesis_initiated_by_attack_of_the_azide_distal_nitrogen			124.978				-546395	-546270	3.5	-5.55	19.697
D	Concerted_mechanism_of_synthesis_of_4-iodotriazoles			124.341				-546391	-546267	3.5	-2.07	22.54
D	4-iodotriazole_synthesis_initiated_by_attack_of_the_azide_distal_nitrogen			124.734				-546391	-546266	3.5	-1.83	23.173
D	Concerted_mechanism_of_synthesis_of_5-iodotriazoles			125.675				-546391	-546265	3.5	-2.01	23.934
D	4-iodotriazole_synthesis_initiated_by_attack_of_the_azide_proximal_nitrogen			125.383				-546385	-546260	3.5	3.77	29.422
D	5-iodotriazole_synthesis_initiated_by_attack_of_the_azide_proximal_nitrogen			123.789				-546383	-546260	3.5	5.68	29.738
E	separated azide, Cu(NH3)2 and iodoalkyne	86.358	88.134	22.545	49.106	55.068	219.984	-563637	-563614	0	0	0
E	separated azide and Cu-iodoalkyne pi-complex	87.184	88.368	34.711	52.746	56.721	179.965	-563655	-563621	1	-18.37	-6.204
E	uncatalyzed pre-reactional complex + Cu(NH3)2			33.07			128.996	-563635	-563602	2	1.56	12.085
E	pre-reactional complexes catalyzed			45.692			147.739	-563661	-563615	3	-23.53	-0.383
E	Concerted_mechanism_of_synthesis_of_5-iodotriazoles			47.89				-563648	-563600	3.5	-10.86	14.485
E	Concerted_mechanism_of_synthesis_of_4-iodotriazoles			47.951				-563647	-563599	3.5	-10.22	15.186
E	5-iodotriazole_synthesis_initiated_by_attack_of_the_azide_distal_nitrogen			48.776				-563647	-563598	3.5	-9.87	16.361
E	4-iodotriazole_synthesis_initiated_by_attack_of_the_azide_proximal_nitrogen			48.39				-563642	-563593	3.5	-4.52	21.325
E	4-iodotriazole_synthesis_initiated_by_attack_of_the_azide_distal_nitrogen			48.079				-563639	-563591	3.5	-1.67	23.864
E	5-iodotriazole_synthesis_initiated_by_attack_of_the_azide_proximal_nitrogen			47.66				-563637	-563589	3.5	-0.12	24.995
F	separated azide, Cu(NH3)2 and iodoalkyne	117.995	119.771	55.749	47.316	53.278	214.73	-401518	-401462	0	0	0
F	separated azide and Cu-iodoalkyne pi-complex	117.984	119.169	67.596	49.469	53.443	172.975	-401534	-401466	1	-15.88	-4.033
F	uncatalyzed pre-reactional complex + Cu(NH3)2			67.308			120.656	-401522	-401455	2	-4.73	6.829
F	pre-reactional complexes catalyzed			80.231			135.465	-401543	-401463	3	-25.15	-0.668
F	5-iodotriazole_synthesis_initiated_by_attack_of_the_azide_distal_nitrogen			80.579				-401527	-401447	3.5	-9.75	15.08
F	Concerted_mechanism_of_synthesis_of_5-iodotriazoles			79.311				-401521	-401442	3.5	-3.39	20.172
F	4-iodotriazole_synthesis_initiated_by_attack_of_the_azide_distal_nitrogen			80.847				-401522	-401441	3.5	-4.63	20.468
F	Concerted_mechanism_of_synthesis_of_4-iodotriazoles			79.577				-401521	-401441	3.5	-3.15	20.678
F	4-iodotriazole_synthesis_initiated_by_attack_of_the_azide_proximal_nitrogen			80.283				-401517	-401437	3.5	0.4	24.934
F	5-iodotriazole_synthesis_initiated_by_attack_of_the_azide_proximal_nitrogen			79.479				-401515	-401436	3.5	2.42	26.15
G	separated azide, Cu(NH3)2 and iodoalkyne	133.906	135.682	68.347	56.15	62.111	225.842	-497103	-497034	0	0	0
G	separated azide and Cu-iodoalkyne pi-complex	135.311	136.495	80.506	62.01	65.984	187.787	-497117	-497036	1	-13.94	-1.781
G	uncatalyzed pre-reactional complex + Cu(NH3)2			78.867			137.298	-497105	-497026	2	-2.49	8.03
G	pre-reactional complexes catalyzed			93.754			144.227	-497125	-497032	3	-22.84	2.567
G	Concerted_mechanism_of_synthesis_of_4-iodotriazoles			92.718				-497109	-497017	3.5	-6.65	17.721
G	Concerted_mechanism_of_synthesis_of_5-iodotriazoles			92.863				-497108	-497015	3.5	-4.98	19.536
G	4-iodotriazole_synthesis_initiated_by_attack_of_the_azide_distal_nitrogen			93.599				-497108	-497014	3.5	-5.34	19.912
G	5-iodotriazole_synthesis_initiated_by_attack_of_the_azide_distal_nitrogen			94.122				-497108	-497014	3.5	-5.24	20.535
G	4-iodotriazole_synthesis_initiated_by_attack_of_the_azide_proximal_nitrogen			93.289				-497102	-497009	3.5	0.2	25.142
G	5-iodotriazole_synthesis_initiated_by_attack_of_the_azide_proximal_nitrogen			93.578				-497100	-497006	3.5	2.93	28.161
H	separated azide, Cu(NH3)2 and iodoalkyne	105.011	106.788	38.111	53.686	59.648	230.341	-588275	-588237	0	0	0
H	separated azide and Cu-iodoalkyne pi-complex	105.837	107.022	50.277	57.326	61.301	190.322	-588293	-588243	1	-18.37	-6.204
H	uncatalyzed pre-reactional complex + Cu(NH3)2			47.95			143.733	-588273	-588225	2	1.97	11.809
H	pre-reactional complexes catalyzed			62.107			156.033	-588301	-588239	3	-25.54	-1.544
H	Concerted_mechanism_of_synthesis_of_5-iodotriazoles			63.726				-588287	-588223	3.5	-11.71	13.905
H	Concerted_mechanism_of_synthesis_of_4-iodotriazoles			64.506				-588285	-588221	3.5	-9.98	16.415
H	5-iodotriazole_synthesis_initiated_by_attack_of_the_azide_distal_nitrogen			64.294				-588284	-588219	3.5	-8.62	17.563
H	4-iodotriazole_synthesis_initiated_by_attack_of_the_azide_proximal_nitrogen			64.326				-588281	-588217	3.5	-5.86	20.355
H	5-iodotriazole_synthesis_initiated_by_attack_of_the_azide_proximal_nitrogen			63.793				-588277	-588214	3.5	-2.28	23.402
H	4-iodotriazole_synthesis_initiated_by_attack_of_the_azide_distal_nitrogen			63.538				-588276	-588213	3.5	-1.07	24.357
I	separated azide, Cu(NH3)2 and iodoalkyne	136.648	138.425	71.315	51.896	57.858	225.087	-426156	-426084	0	0	0
I	separated azide and Cu-iodoalkyne pi-complex	136.637	137.823	83.162	54.049	58.023	183.332	-426172	-426088	1	-15.88	-4.033
I	uncatalyzed pre-reactional complex + Cu(NH3)2			80.628			142.441	-426155	-426075	2	0.38	9.693
I	pre-reactional complexes catalyzed			94.91			148.508	-426177	-426082	3	-21.28	2.315
I	5-iodotriazole_synthesis_initiated_by_attack_of_the_azide_distal_nitrogen			96.72				-426162	-426065	3.5	-5.96	19.445
I	Concerted_mechanism_of_synthesis_of_5-iodotriazoles			95.512				-426160	-426064	3.5	-4.16	20.037
I	Concerted_mechanism_of_synthesis_of_4-iodotriazoles			95.17				-426159	-426064	3.5	-3.57	20.285
I	4-iodotriazole_synthesis_initiated_by_attack_of_the_azide_distal_nitrogen			96.443				-426159	-426062	3.5	-2.93	22.198
I	4-iodotriazole_synthesis_initiated_by_attack_of_the_azide_proximal_nitrogen			96.237				-426156	-426060	3.5	-0.37	24.552
I	5-iodotriazole_synthesis_initiated_by_attack_of_the_azide_proximal_nitrogen			96.266				-426154	-426058	3.5	1.55	26.501
J	separated azide, Cu(NH3)2 and iodoalkyne	152.559	154.336	83.913	60.73	66.691	236.199	-521741	-521657	0	0	0
J	separated azide and Cu-iodoalkyne pi-complex	153.964	155.149	96.072	66.59	70.564	198.144	-521755	-521659	1	-13.94	-1.781
J	uncatalyzed pre-reactional complex + Cu(NH3)2			93.312			153.362	-521740	-521646	2	1.11	10.509
J	pre-reactional complexes catalyzed			109.409			153.759	-521761	-521652	3	-20.49	5.006
J	Concerted_mechanism_of_synthesis_of_5-iodotriazoles			109.017				-521747	-521638	3.5	-6.19	18.914
J	Concerted_mechanism_of_synthesis_of_4-iodotriazoles			107.76				-521745	-521637	3.5	-4.53	19.317
J	4-iodotriazole_synthesis_initiated_by_attack_of_the_azide_distal_nitrogen			108.864				-521745	-521636	3.5	-3.89	21.061
J	5-iodotriazole_synthesis_initiated_by_attack_of_the_azide_distal_nitrogen			109.368				-521744	-521635	3.5	-3.54	21.915
J	5-iodotriazole_synthesis_initiated_by_attack_of_the_azide_proximal_nitrogen			109.573				-521741	-521632	3.5	-0.67	24.99
J	4-iodotriazole_synthesis_initiated_by_attack_of_the_azide_proximal_nitrogen			109.799				-521741	-521631	3.5	0.14	26.026
K	separated azide, Cu(NH3)2 and iodoalkyne	139.137	140.914	67.175	67.606	73.568	247.317	-708506	-708438	0	0	0
K	separated azide and Cu-iodoalkyne pi-complex	139.963	141.148	79.341	71.246	75.221	207.298	-708524	-708445	1	-18.37	-6.204
K	uncatalyzed pre-reactional complex + Cu(NH3)2			78.182			156.746	-708504	-708426	2	1.81	12.817
K	pre-reactional complexes catalyzed			93.172			163.481	-708531	-708438	3	-25.25	0.747
K	Concerted_mechanism_of_synthesis_of_4-iodotriazoles			93.26				-708514	-708421	3.5	-8.28	17.805
K	Concerted_mechanism_of_synthesis_of_5-iodotriazoles			93.918				-708514	-708420	3.5	-8.62	18.123
K	5-iodotriazole_synthesis_initiated_by_attack_of_the_azide_distal_nitrogen			95.101				-708513	-708418	3.5	-7.04	20.886
K	4-iodotriazole_synthesis_initiated_by_attack_of_the_azide_distal_nitrogen			92.137				-708506	-708414	3.5	-0.49	24.472
K	4-iodotriazole_synthesis_initiated_by_attack_of_the_azide_proximal_nitrogen			93.329				-708504	-708411	3.5	1.52	27.674
K	5-iodotriazole_synthesis_initiated_by_attack_of_the_azide_proximal_nitrogen			93.377				-708502	-708409	3.5	3.58	29.782
L	separated azide, Cu(NH3)2 and iodoalkyne	170.774	172.551	100.379	65.816	71.778	242.063	-546386	-546286	0	0	0
L	separated azide and Cu-iodoalkyne pi-complex	170.763	171.949	112.226	67.969	71.943	200.308	-546402	-546290	1	-15.88	-4.033
L	uncatalyzed pre-reactional complex + Cu(NH3)2			110.258			155.02	-546384	-546273	2	2.6	12.479
L	pre-reactional complexes catalyzed			124.229			166.729	-546405	-546280	3	-18.45	5.4
L	5-iodotriazole_synthesis_initiated_by_attack_of_the_azide_distal_nitrogen			126.114				-546393	-546267	3.5	-6.42	19.315
L	4-iodotriazole_synthesis_initiated_by_attack_of_the_azide_distal_nitrogen			125.234				-546390	-546265	3.5	-4.17	20.685
L	Concerted_mechanism_of_synthesis_of_5-iodotriazoles			124.08				-546388	-546264	3.5	-2.13	21.571
L	Concerted_mechanism_of_synthesis_of_4-iodotriazoles			123.397				-546388	-546264	3.5	-1.39	21.628
L	4-iodotriazole_synthesis_initiated_by_attack_of_the_azide_proximal_nitrogen			126.218				-546381	-546255	3.5	5.48	31.319
L	5-iodotriazole_synthesis_initiated_by_attack_of_the_azide_proximal_nitrogen			126.214				-546380	-546254	3.5	5.91	31.745
M	separated azide, Cu(NH3)2 and iodoalkyne	186.685	188.462	112.977	74.65	80.611	253.175	-641971	-641858	0	0	0
M	separated azide and Cu-iodoalkyne pi-complex	188.09	189.275	125.136	80.51	84.484	215.12	-641985	-641860	1	-13.94	-1.781
M	uncatalyzed pre-reactional complex + Cu(NH3)2			122.113			171.004	-641968	-641845	2	3.58	12.716
M	pre-reactional complexes catalyzed			139.154			167.964	-641989	-641850	3	-17.89	8.287
M	Concerted_mechanism_of_synthesis_of_5-iodotriazoles			138.9				-641975	-641836	3.5	-3.66	22.263
M	5-iodotriazole_synthesis_initiated_by_attack_of_the_azide_distal_nitrogen			140.453				-641976	-641836	3.5	-4.91	22.566
M	4-iodotriazole_synthesis_initiated_by_attack_of_the_azide_distal_nitrogen			140.881				-641976	-641835	3.5	-4.5	23.404
M	Concerted_mechanism_of_synthesis_of_4-iodotriazoles			138.652				-641971	-641832	3.5	0.65	26.325
M	4-iodotriazole_synthesis_initiated_by_attack_of_the_azide_proximal_nitrogen			140.625				-641969	-641829	3.5	1.74	29.388
M	5-iodotriazole_synthesis_initiated_by_attack_of_the_azide_proximal_nitrogen			139.435				-641967	-641828	3.5	4.17	30.628
N	separated azide, Cu(NH3)2 and iodoalkyne	157.278	159.055	82.702	73.694	79.656	256.088	-733151	-733068	0	0	0
N	separated azide and Cu-iodoalkyne pi-complex	158.104	159.289	94.868	77.334	81.309	216.069	-733169	-733075	1	-18.37	-6.204
N	uncatalyzed pre-reactional complex + Cu(NH3)2			91.761			173.972	-733149	-733058	2	1.72	10.779
N	pre-reactional complexes catalyzed			106.932			179.326	-733174	-733067	3	-22.46	1.77
N	Concerted_mechanism_of_synthesis_of_5-iodotriazoles			108.534				-733160	-733051	3.5	-8.86	16.972
N	Concerted_mechanism_of_synthesis_of_4-iodotriazoles			108.62				-733159	-733051	3.5	-8.31	17.608
N	5-iodotriazole_synthesis_initiated_by_attack_of_the_azide_distal_nitrogen			110.11				-733158	-733048	3.5	-7.04	20.368
N	4-iodotriazole_synthesis_initiated_by_attack_of_the_azide_distal_nitrogen			106.943				-733155	-733048	3.5	-3.47	20.771
N	4-iodotriazole_synthesis_initiated_by_attack_of_the_azide_proximal_nitrogen			108.005				-733149	-733041	3.5	1.59	26.893
N	5-iodotriazole_synthesis_initiated_by_attack_of_the_azide_proximal_nitrogen			108.678				-733149	-733040	3.5	2.55	28.526
O	separated azide, Cu(NH3)2 and iodoalkyne	188.915	190.692	115.906	71.904	77.866	250.834	-571032	-570916	0	0	0
O	separated azide and Cu-iodoalkyne pi-complex	188.904	190.09	127.753	74.057	78.031	209.079	-571048	-570920	1	-15.88	-4.033
O	uncatalyzed pre-reactional complex + Cu(NH3)2			127.124			157.278	-571029	-570902	2	2.68	13.898
O	pre-reactional complexes catalyzed			141.32			165.322	-571051	-570910	3	-19.55	5.864
O	4-iodotriazole_synthesis_initiated_by_attack_of_the_azide_distal_nitrogen			140.49				-571036	-570895	3.5	-4.1	20.484
O	Concerted_mechanism_of_synthesis_of_4-iodotriazoles			138.051				-571033	-570895	3.5	-1.14	21.005
O	Concerted_mechanism_of_synthesis_of_5-iodotriazoles			139.294				-571034	-570895	3.5	-2.1	21.288
O	5-iodotriazole_synthesis_initiated_by_attack_of_the_azide_distal_nitrogen			143.314				-571037	-570894	3.5	-5.34	22.068
O	4-iodotriazole_synthesis_initiated_by_attack_of_the_azide_proximal_nitrogen			141.777				-571029	-570887	3.5	2.9	28.771
O	5-iodotriazole_synthesis_initiated_by_attack_of_the_azide_proximal_nitrogen			140.098				-571026	-570886	3.5	5.97	30.162
P	separated azide, Cu(NH3)2 and iodoalkyne	204.826	206.603	128.504	80.738	86.699	261.946	-666617	-666488	0	0	0
P	separated azide and Cu-iodoalkyne pi-complex	206.231	207.416	140.663	86.598	90.572	223.891	-666631	-666490	1	-13.94	-1.781
P	uncatalyzed pre-reactional complex + Cu(NH3)2			140.344			166.249	-666612	-666472	2	4.75	16.59
P	pre-reactional complexes catalyzed			155.171			172.623	-666636	-666481	3	-19.29	7.377
P	5-iodotriazole_synthesis_initiated_by_attack_of_the_azide_distal_nitrogen			154.036				-666621	-666467	3.5	-4.34	21.192
P	4-iodotriazole_synthesis_initiated_by_attack_of_the_azide_distal_nitrogen			156.362				-666623	-666466	3.5	-6.17	21.688
P	Concerted_mechanism_of_synthesis_of_5-iodotriazoles			154.808				-666621	-666466	3.5	-3.91	22.394
P	Concerted_mechanism_of_synthesis_of_4-iodotriazoles			153.981				-666616	-666462	3.5	0.55	26.027
P	4-iodotriazole_synthesis_initiated_by_attack_of_the_azide_proximal_nitrogen			153.947				-666614	-666460	3.5	2.93	28.373
P	5-iodotriazole_synthesis_initiated_by_attack_of_the_azide_proximal_nitrogen			155.686				-666609	-666453	3.5	7.55	34.732
A	separated azide and iodoalkyne	47.088	48.273	8.606	24.62	28.594	133.041	-183281	-183272	0	0	0
A	pre-reactional complexes			15.369			114.562	-183279	-183263	3	1.78	8.543
A	Uncatalyzed_synthesis_of_4-iodotriazoles			20.923				-183268	-183247	3.5	12.69	25.007
A	Uncatalyzed_synthesis_of_5-iodotriazoles			20.929				-183268	-183247	3.5	12.88	25.203
B	separated azide and iodoalkyne	65.741	66.927	24.172	29.2	33.174	143.398	-207919	-207894	0	0	0
B	pre-reactional complexes			33.889			113.228	-207920	-207886	3	-0.96	8.757
B	Uncatalyzed_synthesis_of_5-iodotriazoles			36.96				-207907	-207870	3.5	11.87	24.658
B	Uncatalyzed_synthesis_of_4-iodotriazoles			36.707				-207907	-207870	3.5	12.05	24.585
C	separated azide and iodoalkyne	99.867	101.053	53.236	43.12	47.094	160.374	-328149	-328096	0	0	0
C	pre-reactional complexes			61.656			134.163	-328147	-328085	3	2.29	10.71
C	Uncatalyzed_synthesis_of_4-iodotriazoles			65.615				-328137	-328071	3.5	12.24	24.619
C	Uncatalyzed_synthesis_of_5-iodotriazoles			65.581				-328137	-328071	3.5	12.5	24.845
D	separated azide and iodoalkyne	118.008	119.194	68.763	49.208	53.182	169.145	-352795	-352726	0	0	0
D	pre-reactional complexes			76.31			147.604	-352793	-352717	3	1.43	8.977
D	Uncatalyzed_synthesis_of_4-iodotriazoles			81.161				-352782	-352701	3.5	12.2	24.598
D	Uncatalyzed_synthesis_of_5-iodotriazoles			81.533				-352782	-352701	3.5	12.41	25.18
E	separated azide and iodoalkyne	34.006	35.19	-8.423	31.177	35.152	146.276	-370043	-370051	0	0	0
E	pre-reactional complexes			2.102			111.067	-370041	-370039	3	1.56	12.085
E	Uncatalyzed_synthesis_of_5-iodotriazoles			4.046				-370033	-370029	3.5	9.49	21.959
E	Uncatalyzed_synthesis_of_4-iodotriazoles			4.199				-370033	-370029	3.5	9.51	22.132
F	separated azide and iodoalkyne	65.643	66.827	24.781	29.387	33.362	141.022	-207923	-207898	0	0	0
F	pre-reactional complexes			36.34			102.727	-207928	-207892	3	-4.73	6.829
F	Uncatalyzed_synthesis_of_4-iodotriazoles			36.919				-207910	-207873	3.5	12.98	25.118
F	Uncatalyzed_synthesis_of_5-iodotriazoles			36.869				-207910	-207873	3.5	13.21	25.298
G	separated azide and iodoalkyne	81.554	82.738	37.379	38.221	42.195	152.134	-303508	-303471	0	0	0
G	pre-reactional complexes			47.899			119.369	-303511	-303463	3	-2.49	8.03
G	Uncatalyzed_synthesis_of_4-iodotriazoles			49.771				-303495	-303445	3.5	13.41	25.802
G	Uncatalyzed_synthesis_of_5-iodotriazoles			49.647				-303494	-303445	3.5	13.79	26.058
H	separated azide and iodoalkyne	52.659	53.844	7.143	35.757	39.732	156.633	-394681	-394674	0	0	0
H	pre-reactional complexes			16.982			125.804	-394679	-394662	3	1.97	11.809
H	Uncatalyzed_synthesis_of_5-iodotriazoles			20.253				-394673	-394652	3.5	7.95	21.06
H	Uncatalyzed_synthesis_of_4-iodotriazoles			20.478				-394673	-394652	3.5	8.12	21.455
I	separated azide and iodoalkyne	84.296	85.481	40.347	33.967	37.942	151.379	-232561	-232521	0	0	0
I	pre-reactional complexes			49.66			124.512	-232561	-232511	3	0.38	9.693
I	Uncatalyzed_synthesis_of_4-iodotriazoles			52.824				-232549	-232496	3.5	12.47	24.947
I	Uncatalyzed_synthesis_of_5-iodotriazoles			53.058				-232549	-232496	3.5	12.3	25.011
J	separated azide and iodoalkyne	100.207	101.392	52.945	42.801	46.775	162.491	-328146	-328093	0	0	0
J	pre-reactional complexes			62.344			135.433	-328145	-328083	3	1.11	10.509
J	Uncatalyzed_synthesis_of_5-iodotriazoles			65.417				-328134	-328068	3.5	12.59	25.062
J	Uncatalyzed_synthesis_of_4-iodotriazoles			65.606				-328134	-328068	3.5	12.76	25.421
K	separated azide and iodoalkyne	86.785	87.97	36.207	49.677	53.652	173.609	-514911	-514875	0	0	0
K	pre-reactional complexes			47.214			138.817	-514909	-514862	3	1.81	12.817
K	Uncatalyzed_synthesis_of_5-iodotriazoles			49.03				-514901	-514852	3.5	9.71	22.533
K	Uncatalyzed_synthesis_of_4-iodotriazoles			49.67				-514902	-514852	3.5	9.34	22.803
L	separated azide and iodoalkyne	118.422	119.607	69.411	47.887	51.862	168.355	-352792	-352722	0	0	0
L	pre-reactional complexes			79.29			137.091	-352789	-352710	3	2.6	12.479
L	Uncatalyzed_synthesis_of_4-iodotriazoles			82.019				-352779	-352697	3.5	12.34	24.948
L	Uncatalyzed_synthesis_of_5-iodotriazoles			81.898				-352779	-352697	3.5	12.51	24.997
M	separated azide and iodoalkyne	134.333	135.518	82.009	56.721	60.695	179.467	-448377	-448295	0	0	0
M	pre-reactional complexes			91.145			153.075	-448373	-448282	3	3.58	12.716
M	Uncatalyzed_synthesis_of_4-iodotriazoles			95.733				-448363	-448267	3.5	14.05	27.774
M	Uncatalyzed_synthesis_of_5-iodotriazoles			96.488				-448363	-448267	3.5	13.78	28.259
N	separated azide and iodoalkyne	104.926	106.111	51.734	55.765	59.74	182.38	-539557	-539505	0	0	0
N	pre-reactional complexes			60.793			156.043	-539555	-539494	3	1.72	10.779
N	Uncatalyzed_synthesis_of_5-iodotriazoles			65.011				-539547	-539482	3.5	9.45	22.727
N	Uncatalyzed_synthesis_of_4-iodotriazoles			65.302				-539547	-539482	3.5	9.51	23.078
O	separated azide and iodoalkyne	136.563	137.748	84.938	53.975	57.95	177.126	-377437	-377352	0	0	0
O	pre-reactional complexes			96.156			139.349	-377435	-377338	3	2.68	13.898
O	Uncatalyzed_synthesis_of_4-iodotriazoles			97.03				-377425	-377328	3.5	12.52	24.612
O	Uncatalyzed_synthesis_of_5-iodotriazoles			97.837				-377425	-377327	3.5	12.79	25.689
P	separated azide and iodoalkyne	152.474	153.659	97.536	62.809	66.783	188.238	-473022	-472925	0	0	0
P	pre-reactional complexes			109.376			148.32	-473018	-472908	3	4.75	16.59
P	Uncatalyzed_synthesis_of_4-iodotriazoles			110.054				-473009	-472899	3.5	12.92	25.438
P	Uncatalyzed_synthesis_of_5-iodotriazoles			111.251				-473009	-472897	3.5	13.63	27.345

## Sheet: graphs H-N3
			Delta free energy in solution (w/ vib, rot, trans contribs to Delta G)	Delta free energy in solution (w/ vib, rot, trans contribs to Delta G)		Delta sol energy	Delta sol energy
			catalyzed	non-catalyzed		catalyzed	non-catalyzed
A	separated azide, Cu(NH3)2 and iodoalkyne	0	0	0		0	0
A		0.7	0	0		0	0
A	separated azide and Cu-iodoalkyne pi-complex	1	-4.082	0		-15	0
A		1.7	-4.082	0		-15	0
A	pre-reactional complexes catalyzed	2	0.27	8.543		-21.05	1.78
A		2.7	0.27	8.543		-21.05	1.78
A	Concerted_mechanism_of_synthesis_of_5-iodotriazoles	3	19.805	25.203		-3.71	12.88
A		3.7	19.805	25.203	23.887	-3.71	12.88		-1.316	5.398
E	separated azide, Cu(NH3)2 and iodoalkyne	0	0	0		0	0
E		0.7	0	0		0	0
E	separated azide and Cu-iodoalkyne pi-complex	1	-6.204	0		-18.37	0
E		1.7	-6.204	0		-18.37	0
E	pre-reactional complexes catalyzed	2	-0.383	12.085		-23.53	1.56
E		2.7	-0.383	12.085		-23.53	1.56
E	Concerted_mechanism_of_synthesis_of_5-iodotriazoles	3	14.485	21.959		-10.86	9.49
E		3.7	14.485	21.959	20.689	-10.86	9.49		-1.27	7.474
F	separated azide, Cu(NH3)2 and iodoalkyne	0	0	0		0	0
F		0.7	0	0		0	0
F	separated azide and Cu-iodoalkyne pi-complex	1	-4.033	0		-15.88	0
F		1.7	-4.033	0		-15.88	0
F	pre-reactional complexes catalyzed	2	-0.668	6.829		-25.15	-4.73
F		2.7	-0.668	6.829		-25.15	-4.73
F	Concerted_mechanism_of_synthesis_of_5-iodotriazoles	3	20.172	25.298		-3.39	13.21
F		3.7	20.172	25.298	24.205	-3.39	13.21		-1.093	5.126
G	separated azide, Cu(NH3)2 and iodoalkyne	0	0	0		0	0
G		0.7	0	0		0	0
G	separated azide and Cu-iodoalkyne pi-complex	1	-1.781	0		-13.94	0
G		1.7	-1.781	0		-13.94	0
G	pre-reactional complexes catalyzed	2	2.567	8.03		-22.84	-2.49
G		2.7	2.567	8.03		-22.84	-2.49
G	Concerted_mechanism_of_synthesis_of_5-iodotriazoles	3	19.536	26.058		-4.98	13.79
G		3.7	19.536	26.058	21.317	-4.98	13.79		-4.741	6.522

## Sheet: graphs CH3-N3
			Delta free energy in solution (w/ vib, rot, trans contribs to Delta G)	Delta free energy in solution (w/ vib, rot, trans contribs to Delta G)		Delta sol energy	Delta sol energy
			catalyzed	non-catalyzed		catalyzed	non-catalyzed
B	separated azide, Cu(NH3)2 and iodoalkyne	0	0	0		0	0
B		0.7	0	0		0	0
B	separated azide and Cu-iodoalkyne pi-complex	1	-4.082	0		-15	0
B		1.7	-4.082	0		-15	0
B	pre-reactional complexes catalyzed	2	1.61	8.757		-21.42	-0.96
B		2.7	1.61	8.757		-21.42	-0.96
B	Concerted_mechanism_of_synthesis_of_5-iodotriazoles	3	19.219	24.658		-4.74	11.87
B		3.7	19.219	24.658		-4.74	11.87		-1.357	5.439
H	separated azide, Cu(NH3)2 and iodoalkyne	0	0	0		0	0
H		0.7	0	0		0	0
H	separated azide and Cu-iodoalkyne pi-complex	1	-6.204	0		-18.37	0
H		1.7	-6.204	0		-18.37	0
H	pre-reactional complexes catalyzed	2	-1.544	11.809		-25.54	1.97
H		2.7	-1.544	11.809		-25.54	1.97
H	Concerted_mechanism_of_synthesis_of_5-iodotriazoles	3	13.905	21.06		-11.71	7.95
H		3.7	13.905	21.06		-11.71	7.95		-0.951	7.155
I	separated azide, Cu(NH3)2 and iodoalkyne	0	0	0		0	0
I		0.7	0	0		0	0
I	separated azide and Cu-iodoalkyne pi-complex	1	-4.033	0		-15.88	0
I		1.7	-4.033	0		-15.88	0
I	pre-reactional complexes catalyzed	2	2.315	9.693		-21.28	0.38
I		2.7	2.315	9.693		-21.28	0.38
I	Concerted_mechanism_of_synthesis_of_5-iodotriazoles	3	20.037	25.011		-4.16	12.3
I		3.7	20.037	25.011		-4.16	12.3		-0.941	4.974
J	separated azide, Cu(NH3)2 and iodoalkyne	0	0	0		0	0
J		0.7	0	0		0	0
J	separated azide and Cu-iodoalkyne pi-complex	1	-1.781	0		-13.94	0
J		1.7	-1.781	0		-13.94	0
J	pre-reactional complexes catalyzed	2	5.006	10.509		-20.49	1.11
J		2.7	5.006	10.509		-20.49	1.11
J	Concerted_mechanism_of_synthesis_of_5-iodotriazoles	3	18.914	25.062		-6.19	12.59
J		3.7	18.914	25.062		-6.19	12.59		-4.367	6.148

## Sheet: graphs Ph-N3
			Delta free energy in solution (w/ vib, rot, trans contribs to Delta G)	Delta free energy in solution (w/ vib, rot, trans contribs to Delta G)		Delta sol energy	Delta sol energy
			catalyzed	non-catalyzed		catalyzed	non-catalyzed
C	separated azide, Cu(NH3)2 and iodoalkyne	0	0	0		0	0
C		0.7	0	0		0	0
C	separated azide and Cu-iodoalkyne pi-complex	1	-4.082	0		-15	0
C		1.7	-4.082	0		-15	0
C	pre-reactional complexes catalyzed	2	7.084	10.71		-17.08	2.29
C		2.7	7.084	10.71		-17.08	2.29
C	Concerted_mechanism_of_synthesis_of_5-iodotriazoles	3	24.3	24.845		-2.01	12.5
C		3.7	24.3	24.845		-2.01	12.5		3.537	0.545
K	separated azide, Cu(NH3)2 and iodoalkyne	0	0	0		0	0
K		0.7	0	0		0	0
K	separated azide and Cu-iodoalkyne pi-complex	1	-6.204	0		-18.37	0
K		1.7	-6.204	0		-18.37	0
K	pre-reactional complexes catalyzed	2	0.747	12.817		-25.25	1.81
K		2.7	0.747	12.817		-25.25	1.81
K	Concerted_mechanism_of_synthesis_of_5-iodotriazoles	3	18.123	22.533		-8.62	9.71
K		3.7	18.123	22.533		-8.62	9.71		1.794	4.41
L	separated azide, Cu(NH3)2 and iodoalkyne	0	0	0		0	0
L		0.7	0	0		0	0
L	separated azide and Cu-iodoalkyne pi-complex	1	-4.033	0		-15.88	0
L		1.7	-4.033	0		-15.88	0
L	pre-reactional complexes catalyzed	2	5.4	12.479		-18.45	2.6
L		2.7	5.4	12.479		-18.45	2.6
L	Concerted_mechanism_of_synthesis_of_5-iodotriazoles	3	21.571	24.997		-2.13	12.51
L		3.7	21.571	24.997		-2.13	12.51		0.607	3.426
M	separated azide, Cu(NH3)2 and iodoalkyne	0	0	0		0	0
M		0.7	0	0		0	0
M	separated azide and Cu-iodoalkyne pi-complex	1	-1.781	0		-13.94	0
M		1.7	-1.781	0		-13.94	0
M	pre-reactional complexes catalyzed	2	8.287	12.716		-17.89	3.58
M		2.7	8.287	12.716		-17.89	3.58
M	Concerted_mechanism_of_synthesis_of_5-iodotriazoles	3	22.263	28.259		-3.66	13.78
M		3.7	22.263	28.259		-3.66	13.78		-4.215	5.996

## Sheet: graphs MePh-N3
			Delta free energy in solution (w/ vib, rot, trans contribs to Delta G)	Delta free energy in solution (w/ vib, rot, trans contribs to Delta G)		Delta sol energy	Delta sol energy
			catalyzed	non-catalyzed		catalyzed	non-catalyzed
D	separated azide, Cu(NH3)2 and iodoalkyne	0	0	0		0	0
D		0.7	0	0		0	0
D	separated azide and Cu-iodoalkyne pi-complex	1	-4.082	0		-15	0
D		1.7	-4.082	0		-15	0
D	pre-reactional complexes catalyzed	2	5.613	8.977		-18.27	1.43
D		2.7	5.613	8.977		-18.27	1.43
D	Concerted_mechanism_of_synthesis_of_5-iodotriazoles	3	23.934	25.18		-2.01	12.41
D		3.7	23.934	25.18		-2.01	12.41		2.836	1.246
N	separated azide, Cu(NH3)2 and iodoalkyne	0	0	0		0	0
N		0.7	0	0		0	0
N	separated azide and Cu-iodoalkyne pi-complex	1	-6.204	0		-18.37	0
N		1.7	-6.204	0		-18.37	0
N	pre-reactional complexes catalyzed	2	1.77	10.779		-22.46	1.72
N		2.7	1.77	10.779		-22.46	1.72
N	Concerted_mechanism_of_synthesis_of_5-iodotriazoles	3	16.972	22.727		-8.86	9.45
N		3.7	16.972	22.727		-8.86	9.45		0.449	5.755
O	separated azide, Cu(NH3)2 and iodoalkyne	0	0	0		0	0
O		0.7	0	0		0	0
O	separated azide and Cu-iodoalkyne pi-complex	1	-4.033	0		-15.88	0
O		1.7	-4.033	0		-15.88	0
O	pre-reactional complexes catalyzed	2	5.864	13.898		-19.55	2.68
O		2.7	5.864	13.898		-19.55	2.68
O	Concerted_mechanism_of_synthesis_of_5-iodotriazoles	3	21.288	25.689		-2.1	12.79
O		3.7	21.288	25.689		-2.1	12.79		-0.368	4.401
P	separated azide, Cu(NH3)2 and iodoalkyne	0	0	0		0	0
P		0.7	0	0		0	0
P	separated azide and Cu-iodoalkyne pi-complex	1	-1.781	0		-13.94	0
P		1.7	-1.781	0		-13.94	0
P	pre-reactional complexes catalyzed	2	7.377	16.59		-19.29	4.75
P		2.7	7.377	16.59		-19.29	4.75
P	Concerted_mechanism_of_synthesis_of_5-iodotriazoles	3	22.394	27.345		-3.91	13.63
P		3.7	22.394	27.345		-3.91	13.63		-3.17	4.951
